# Supplementary material for: Sensitive monitoring of NAD(P)H levels within cancer cells using mitochondria-targeted near-infrared cyanine dyes with optimized electron-withdrawing acceptors
Source: Royal Society of Chemistry journal article supplement (doi:10.1039/d3tb02124f), 2023-12-08
Supplement: d3tb02124f1.pdf [file d3tb02124f1.pdf]

## Supporting Information

### **Sensitive Monitoring of NAD(P)H Levels within Cancer Cells Using Mitochondria-Targeted Near-Infrared Cyanine Dyes with Optimized Electron-Withdrawing Acceptors**

Dilka Liyana Arachchige,<sup>a,b</sup> Sushil K. Dwivedi,<sup>a,b</sup> May Waters,<sup>a,b</sup> Sophia Jaeger,<sup>a,b</sup> Joe Peters,<sup>a,b</sup> Daniel R. Tucker,<sup>a</sup> Micaela Geborkoff,<sup>c</sup> Thomas Werner,<sup>c</sup> Rudy L Luck<sup>a\*</sup> Bhaskar Godugu<sup>d</sup> and Haiying Liu<sup>a\*</sup>

<sup>a</sup>Department of Chemistry, <sup>b</sup>Health Research Institute, <sup>c</sup>Department of Biological Sciences, Michigan Technological University, Houghton, MI 49931. E-mail: [rluck@mtu.edu](mailto:rluck@mtu.edu) and [hylu@mtu.edu](mailto:hylu@mtu.edu)

<sup>d</sup>Department of Chemistry, University of Pittsburgh, Chevron Science Center, 219 Parkman Avenue, Pittsburgh, PA 15260

## Table of Contents

### Contents

|                                                                                                          |       |
|----------------------------------------------------------------------------------------------------------|-------|
| 1. Table S1. Summary of fluorescent probes for NADH detection.....                                       | S5-S9 |
| 2. Experimental Section .....                                                                            | S10   |
| 2.1 Instrumentation.....                                                                                 | S10   |
| 2.2. Reagents .....                                                                                      | S10   |
| 2.3. Synthesis of fluorescent probes.....                                                                | S10   |
| <b>Scheme 1.</b> Synthetic approach to prepare fluorescent probes. ....                                  | S11   |
| 2.3.1 Synthesis of compound <b>5</b> .....                                                               | S11   |
| 2.3.2. Synthesis of probe <b>A</b> . ....                                                                | S12   |
| 2.3.3. Synthesis of compound <b>8</b> :.....                                                             | S12   |
| 2.3.4. Synthesis of probe <b>B</b> : .....                                                               | S12   |
| 2.3.5. Synthesis of compound <b>10</b> :.....                                                            | S12   |
| 2.3.6. Synthesis of probe <b>C</b> :.....                                                                | S13   |
| 2.3.7. Synthesis of compound <b>12</b> :.....                                                            | S13   |
| 2.3.8. Synthesis of probe <b>D</b> :.....                                                                | S13   |
| 2.3.9. Synthesis of compound <b>14</b> :.....                                                            | S13   |
| 2.3.10. Synthesis of probe <b>E</b> :.....                                                               | S14   |
| 2.4. NMR and Mass Spectra of Fluorescent Probes.....                                                     | S15   |
| <b>Figure S1:</b> <sup>1</sup> H NMR spectrum of compound <b>5</b> in DMSO-d <sub>6</sub> solution. .... | S15   |
| <b>Figure S2:</b> <sup>1</sup> H NMR spectrum of probe <b>A</b> in DMSO-d <sub>6</sub> solution.....     | S16   |
| <b>Figure S3:</b> <sup>13</sup> C NMR spectrum of probe <b>A</b> in DMSO-d <sub>6</sub> solution.....    | S17   |
| <b>Figure S4:</b> <sup>1</sup> H NMR spectrum of compound <b>8</b> in DMSO-d <sub>6</sub> solution ..... | S18   |
| <b>Figure S5:</b> <sup>13</sup> C NMR spectrum of probe <b>B</b> in DMSO-d <sub>6</sub> solution. ....   | S19   |
| <b>Figure S6:</b> <sup>13</sup> C NMR spectrum of probe <b>B</b> in DMSO-d <sub>6</sub> solution. ....   | S20   |
| <b>Figure S7:</b> HRMS spectrum of probe <b>A</b> . ....                                                 | S21   |
| <b>Figure S8:</b> HRMS spectrum of probe <b>B</b> . ....                                                 | S22   |
| <b>Figure S9:</b> HRMS spectrum of probe <b>BH</b> . ....                                                | S23   |
| <b>Figure S10:</b> <sup>1</sup> H NMR spectrum of probe <b>C</b> in DMSO-d <sub>6</sub> solution. ....   | S24   |

|                                                                                                                                                                                                                                                                                                             |     |
|-------------------------------------------------------------------------------------------------------------------------------------------------------------------------------------------------------------------------------------------------------------------------------------------------------------|-----|
| <b>Figure S11:</b> $^1\text{H}$ NMR spectrum of probe <b>D</b> in $\text{DMSO-d}_6$ solution.....                                                                                                                                                                                                           | S25 |
| <b>Figure S12:</b> $^{13}\text{C}$ NMR spectrum of probe <b>D</b> in $\text{DMSO-d}_6$ solution.....                                                                                                                                                                                                        | S26 |
| <b>Figure S13:</b> $^1\text{H}$ NMR spectrum of probe <b>E</b> in $\text{DMSO-d}_6$ solution. ....                                                                                                                                                                                                          | S27 |
| <b>Figure S14:</b> $^{13}\text{C}$ NMR spectrum of probe <b>E</b> in $\text{DMSO-d}_6$ solution. ....                                                                                                                                                                                                       | S28 |
| 2.5. Optical Properties of Fluorescent Probes. ....                                                                                                                                                                                                                                                         | S29 |
| 2.5.1. The linear fluorescence responses of probes to NADH .....                                                                                                                                                                                                                                            | S29 |
| <b>Figure S15:</b> Fluorescence intensity changes of probes <b>A</b> (left) and <b>B</b> (right) (10 $\mu\text{M}$ ) with different concentration of NADH (0-50 $\mu\text{M}$ ). Probes <b>A</b> and <b>B</b> possess a detection limit of 0.151 $\mu\text{M}$ and 0.073 $\mu\text{M}$ , respectively. .... | S29 |
| <b>Figure S16:</b> Absorbance and emission spectra of probe <b>C</b> (10 $\mu\text{M}$ ) upon exposure to varying NADH concentrations (0-50 $\mu\text{M}$ ) in PBS buffer (pH 7.4) with 10% DMSO during a 4-hour incubation period, observed under excitation at 420 nm.....                                | S30 |
| <b>Figure S17:</b> Absorbance and emission spectra of probe <b>C</b> (10 $\mu\text{M}$ ) in response to various NADH concentrations (0-50 $\mu\text{M}$ ) in PBS buffer (pH 7.4) with 10% DMSO during a 4-hour incubation period, acquired under excitation at 680 nm.....                                  | S30 |
| <b>Figure S18:</b> Absorbance and emission spectra of probe <b>D</b> (10 $\mu\text{M}$ ) in response to varying NADH concentrations (0-50 $\mu\text{M}$ ) in PBS buffer (pH 7.4) with 10% DMSO, recorded during a 4-hour incubation period and excited at 480 nm.....                                       | S30 |
| <b>Figure S19:</b> Absorbance and emission spectra of Probe <b>E</b> (10 $\mu\text{M}$ ) in response to different NADH concentrations (0, 2, 4, and 6 $\mu\text{M}$ ) in PBS buffer (pH 7.4) with 10% DMSO. These spectra were recorded during a 2-hour incubation period and excited at 480 nm.....        | S31 |
| 2.5.2. The probe selectivity.....                                                                                                                                                                                                                                                                           | S32 |
| <b>Figure S20:</b> Fluorescence responses of 10 $\mu\text{M}$ probe <b>A</b> to various biomolecules (100 $\mu\text{M}$ ), NADH (50 $\mu\text{M}$ ) and NADPH (50 $\mu\text{M}$ ) under excitation at 630 nm. ....                                                                                          | S32 |
| <b>Figure S21:</b> Fluorescence responses of 10 $\mu\text{M}$ probe <b>B</b> to various biomolecules (100 $\mu\text{M}$ ), NADH (50 $\mu\text{M}$ ) and NADPH (50 $\mu\text{M}$ ) under excitation at 630 nm. ....                                                                                          | S32 |
| 1.5.3. Photostability of the probes. ....                                                                                                                                                                                                                                                                   | S33 |
| <b>Figure S22:</b> The fluorescence intensity of 10 $\mu\text{M}$ probe <b>A</b> was measured over time when excited at 630 nm in the presence of 50 $\mu\text{M}$ NADH. ....                                                                                                                               | S33 |
| <b>Figure S23:</b> The fluorescence intensity of 10 $\mu\text{M}$ probe <b>B</b> was measured over time when excited at 630 nm in the presence of 50 $\mu\text{M}$ NADH. ....                                                                                                                               | S33 |
| <b>Figure S24:</b> The impact of pH on fluorescence intensity is shown for Probes <b>A</b> (left) and <b>B</b> (right) within various pH PBS buffers, with 10% DMSO, both in the absence and presence of 50 $\mu\text{M}$ NADH.....                                                                         | S34 |
| 2.6. Cell culture and cell imaging.....                                                                                                                                                                                                                                                                     | S34 |
| 2.6.1. Cell culture. ....                                                                                                                                                                                                                                                                                   | S34 |
| 2.6.2. Assessing Cell Viability Using MTT Assay. ....                                                                                                                                                                                                                                                       | S34 |

|                                                                                                                                                                                                                                                                                                                                                                                  |     |
|----------------------------------------------------------------------------------------------------------------------------------------------------------------------------------------------------------------------------------------------------------------------------------------------------------------------------------------------------------------------------------|-----|
| <b>Figure S25:</b> MTT assay for probe <b>A</b> (left) and probe <b>B</b> (right) with varying concentrations. ....                                                                                                                                                                                                                                                              | S35 |
| 2.6.3. Drug treatment of A549 cells.....                                                                                                                                                                                                                                                                                                                                         | S35 |
| 2.6.4. Colocalization Study.....                                                                                                                                                                                                                                                                                                                                                 | S35 |
| 2.6.5. Hypoxia experiment.....                                                                                                                                                                                                                                                                                                                                                   | S35 |
| 2.6.6. Cell culture conditions and cellular imaging for fibroblast cells. ....                                                                                                                                                                                                                                                                                                   | S36 |
| <b>Figure S26:</b> Cellular Fluorescence images of Fibroblast cells incubated with 20 $\mu$ M NADH in glucose-free DMEM medium for 30 minutes and incubated with 5 $\mu$ M probe <b>A</b> in glucose-free DMEM medium for varying incubation times. Image fluorescence signals were captured between 700 nm to 780 nm upon 633 nm excitation for both sets of images.....        | S36 |
| <b>Figure S27:</b> Cellular fluorescence images of Fibroblast cells cultivated in DMEM medium containing 0, 5, 10, and 20 mM glucose for 30 min and subsequently treated with 5 $\mu$ M of probe <b>A</b> in glucose-deficient DMEM medium for 30 minutes. Image fluorescence signals were captured between 700 nm to 780 nm upon 633 nm excitation for both sets of images..... | S37 |
| 2.7. <i>D. melanogaster</i> larval imaging .....                                                                                                                                                                                                                                                                                                                                 | S39 |
| 3. Theoretical calculations .....                                                                                                                                                                                                                                                                                                                                                | S39 |
| <b>Table S2:</b> Calculated atomic coordinates for probe <b>A(cis)</b> in water. ....                                                                                                                                                                                                                                                                                            | S40 |
| <b>Table S3:</b> Calculated atomic coordinates for probe <b>A(trans)</b> in water. ....                                                                                                                                                                                                                                                                                          | S40 |
| <b>Table S4:</b> Calculated atomic coordinates for probe <b>AH(cis)</b> in water.....                                                                                                                                                                                                                                                                                            | S41 |
| <b>Table S5:</b> Calculated atomic coordinates for probe <b>AH(trans)</b> in water.....                                                                                                                                                                                                                                                                                          | S42 |
| <b>Table S6:</b> Calculated atomic coordinates for probe <b>B</b> in water. ....                                                                                                                                                                                                                                                                                                 | S43 |
| <b>Table S7:</b> Calculated atomic coordinates for probe <b>BH</b> in water.....                                                                                                                                                                                                                                                                                                 | S44 |
| <b>Table S8:</b> Calculated atomic coordinates for probe <b>C</b> in water. ....                                                                                                                                                                                                                                                                                                 | S45 |
| <b>Table S9:</b> Calculated atomic coordinates for probe <b>CH</b> in water.....                                                                                                                                                                                                                                                                                                 | S46 |
| <b>Table S10:</b> Calculated atomic coordinates for probe <b>D</b> in water.....                                                                                                                                                                                                                                                                                                 | S47 |
| <b>Table S11:</b> Calculated atomic coordinates for probe <b>DH</b> in water. ....                                                                                                                                                                                                                                                                                               | S48 |
| <b>Table S12:</b> Calculated atomic coordinates for probe <b>E</b> in water. ....                                                                                                                                                                                                                                                                                                | S49 |
| <b>Table S13:</b> Calculated atomic coordinates for probe <b>EH</b> in water.....                                                                                                                                                                                                                                                                                                | S50 |
| <b>Figure S28.</b> Drawings of the molecules <b>C, D, E, CH, DH,</b> and <b>EH</b> listed in Table 1 using GausView. <sup>22</sup> ...                                                                                                                                                                                                                                           | S51 |

1. Table S1. Summary of fluorescent probes for NADH detection

| S.N. | Probes                                                                              | Naked-eye detection | Detection Medium              | $\lambda_{ex}/\lambda_{em}$ (nm) | Stokes shifts (nm) | Fluorescence response | Response Time | Targeting ability | Biological Application                            | References |
|------|-------------------------------------------------------------------------------------|---------------------|-------------------------------|----------------------------------|--------------------|-----------------------|---------------|-------------------|---------------------------------------------------|------------|
| 1    | 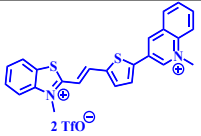   | Yes                 | PBS buffer<br>pH 7.4<br>37 °C | 630/748                          | 117                | Turn ON               | 50 min        | Mitochondria      | Cells<br>Drosophila melanogaster<br>(Fruit flies) | This Work  |
| 2    |    | Yes                 | PBS buffer<br>pH 7.4<br>37 °C | 630/730                          | 49                 | Turn ON               | 120 min       | Mitochondria      | Cells<br>Drosophila melanogaster<br>(Fruit flies) | This Work  |
| 3    |    | Yes                 | PBS buffer<br>pH 7.4<br>37 °C | 475/619                          | 144                | Turn ON               | 150 min       | Mitochondria      | Cells<br>Drosophila melanogaster<br>(Fruit flies) | 1          |
| 4    |  | Yes                 | PBS buffer<br>pH 7.4<br>37 °C | 486/576                          | 90                 | Turn ON               | 150 min       | Mitochondria      | Cells<br>Drosophila melanogaster<br>(Fruit flies) | 1          |
| 5    |  | Yes                 | PBS buffer<br>pH 7.4<br>37 °C | 610/657                          | 47                 | Turn ON               | 25 min        | Mitochondria      | Cells<br>Mice                                     | 2          |

|    |                                                                                     |     |                                                          |                        |               |         |        |              |                                                      |   |
|----|-------------------------------------------------------------------------------------|-----|----------------------------------------------------------|------------------------|---------------|---------|--------|--------------|------------------------------------------------------|---|
| 6  | 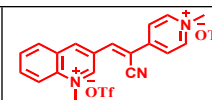   | Yes | PBS buffer<br>pH 7.4<br>37 °C                            | 515/565                | 50            | Turn ON | 3 min  | -            | -                                                    | 2 |
| 7  |    | Yes | PBS buffer<br>pH 7.4<br>37 °C                            | 533/572                | 39            | Turn ON | 6 min  | Mitochondria | Cells<br>Drosophila<br>melanogaster<br>(Fruit flies) | 3 |
| 8  |    | Yes | PBS buffer<br>pH 7.4<br>37 °C                            | 535/586                | 51            | Turn ON | 6 min  | Mitochondria | Cells<br>Drosophila<br>melanogaster<br>(Fruit flies) | 3 |
| 9  |   | No  | PBS<br>buffer<br>pH 7.4<br>37 °C                         | 390/460<br><br>450/550 | 70<br><br>100 | Turn ON | 50 min | Cytoplasm    | Cells<br>Tumor<br>spheroids                          | 4 |
| 10 |  | Yes | PBS–<br>EtOH<br>(PBS, 10<br>mM, pH<br>7.4, 1: 1,<br>v/v) | 510(528)/6<br><br>24   | 96            | Turn ON | 60 min | -            | Cells                                                | 5 |

|    |                                                                                     |    |                                                                          |         |    |          |        |              |               |    |
|----|-------------------------------------------------------------------------------------|----|--------------------------------------------------------------------------|---------|----|----------|--------|--------------|---------------|----|
| 11 | 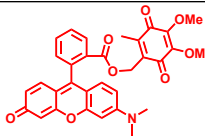   | No | PBS buffer<br>pH 7.4                                                     | 488/520 | 32 | Turn OFF | 10 min | -            | Cells         | 6  |
| 12 |    | No | PBS buffer<br>pH 9.5,<br>37 °C                                           | 480/575 | 95 | Turn ON  | 25 min | Cytoplasm    | Cells         | 7  |
| 13 |    | No | PBS buffer<br>pH 7.4<br>37 °C                                            | 480/575 | 95 | Turn ON  | 25 min | Cytoplasm    | Cells         | 7  |
| 14 |    | No | EtOH/ 0.1<br>mM PBS<br>buffer<br>solution<br>(10/90,<br>pH 7.4)<br>37 °C | 560/650 | 90 | Turn OFF | 10 min | -            | Cells         | 8  |
| 15 |   | No | PBS<br>buffer<br>pH 7.4<br>37 °C                                         | 568/660 | 92 | Turn ON  | 15 min | Mitochondria | Cells<br>Mice | 9  |
| 16 |  | No | PBS<br>buffer<br>pH 7.4<br>37 °C                                         | 582/610 | 28 | Turn ON  | 25 min | -            | Cells<br>Mice | 10 |

|    |                                                                                     |     |                                       |                    |           |         |        |              |                             |    |
|----|-------------------------------------------------------------------------------------|-----|---------------------------------------|--------------------|-----------|---------|--------|--------------|-----------------------------|----|
| 17 | 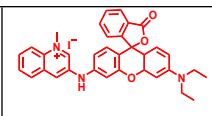   | No  | PBS buffer<br>pH 7.4<br>37 °C         | 510/548            | 38        | Turn ON | 4 h    | Cytoplasm    | Cells                       | 11 |
| 18 |    | Yes | 25 mM<br>PIPES,<br>pH 7.4<br>37 °C    | 570/615            | 45        | Turn ON | 23 h   | Mitochondria | Cells                       | 12 |
| 19 |    | Yes | PBS buffer<br>pH 7.4<br>37 °C         | 510/552            | 42        | Turn ON | 40 min | Cytoplasm    | Cells                       | 13 |
| 20 |    | No  | PBS buffer<br>pH 7.4<br>37 °C         | 590/640            | 50        | Turn ON | 80 min | -            | Cells<br>Tumor<br>spheroids | 14 |
| 21 |   | Yes | PBS buffer<br>pH 7.4<br>37 °C         | 390/460            | 70        | Turn ON | 40 min | Mitochondria | Cells<br>Tumor<br>tissues   | 15 |
| 22 |  | No  | 1:1 mixed<br>DMSO and<br>PBS solution | 595/670<br>400/550 | 75<br>150 | Turn ON | 20 min | Cytoplasm    | Cells                       | 16 |
| 23 |  | Yes | 25 mM<br>PIPES,<br>101 mM             | 537/561            | 24        | Turn ON | 5 min  | Cytoplasm    | Cells<br>Tumor<br>spheroid  | 17 |



|    |                                                                                   |     | NaCl<br>pH 7.0<br>25 °C                 |         |    |         |         |              | Model                                                     |    |
|----|-----------------------------------------------------------------------------------|-----|-----------------------------------------|---------|----|---------|---------|--------------|-----------------------------------------------------------|----|
| 24 | 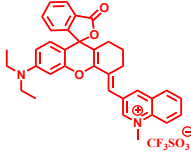 | No  | PBS<br>buffer<br>pH 7.4<br>(5%<br>DMSO) | 670/740 | 70 | Turn ON | 120 min | Mitochondria | Cells                                                     | 18 |
| 25 |  | Yes | PBS buffer<br>(10 mM)                   | 553/584 | 31 | Turn ON | 3 min   | Mitochondria | Influenza virus<br>infected cells<br>(MDCK and<br>BHK-21) | 19 |
| 26 |  | NO  | PBS buffer,<br>pH 7.4                   | 725/745 | 20 | Turn ON | 75 min  | Mitochondria | Cells (NCM-460<br>and HCT-116b)<br>Mice                   | 20 |

## 2. Experimental Section

### 2.1 Instrumentation.

The  $^1\text{H}$  and  $^{13}\text{C}$  nuclear magnetic resonance (NMR) spectra of the fluorescent probes were acquired using a Bruker NMR Spectrophotometer at 500 MHz (Ascend 500) in  $\text{CDCl}_3$  or  $\text{DMSO-d}_6$  solution with concentration around  $2.0 \times 10^{-2}$  M. The absorption spectra of the probes were measured using a PerkinElmer Lambda 35 UV/vis spectrometer, while the fluorescence spectra were recorded using a Jobin Yvon Fluoromax-4 spectrofluorometer.

### 2.2. Reagents

All reagents including metal ions, biothiols, other chemicals and cyanine dye (IR-780) were obtained from commercial suppliers and utilized without additional purification. Intermediates 3 and 7 were synthesized and characterized according to our reported procedure.<sup>1</sup>

### 2.3. Synthesis of fluorescent probes.

The fluorescent probes were published according to Scheme 1

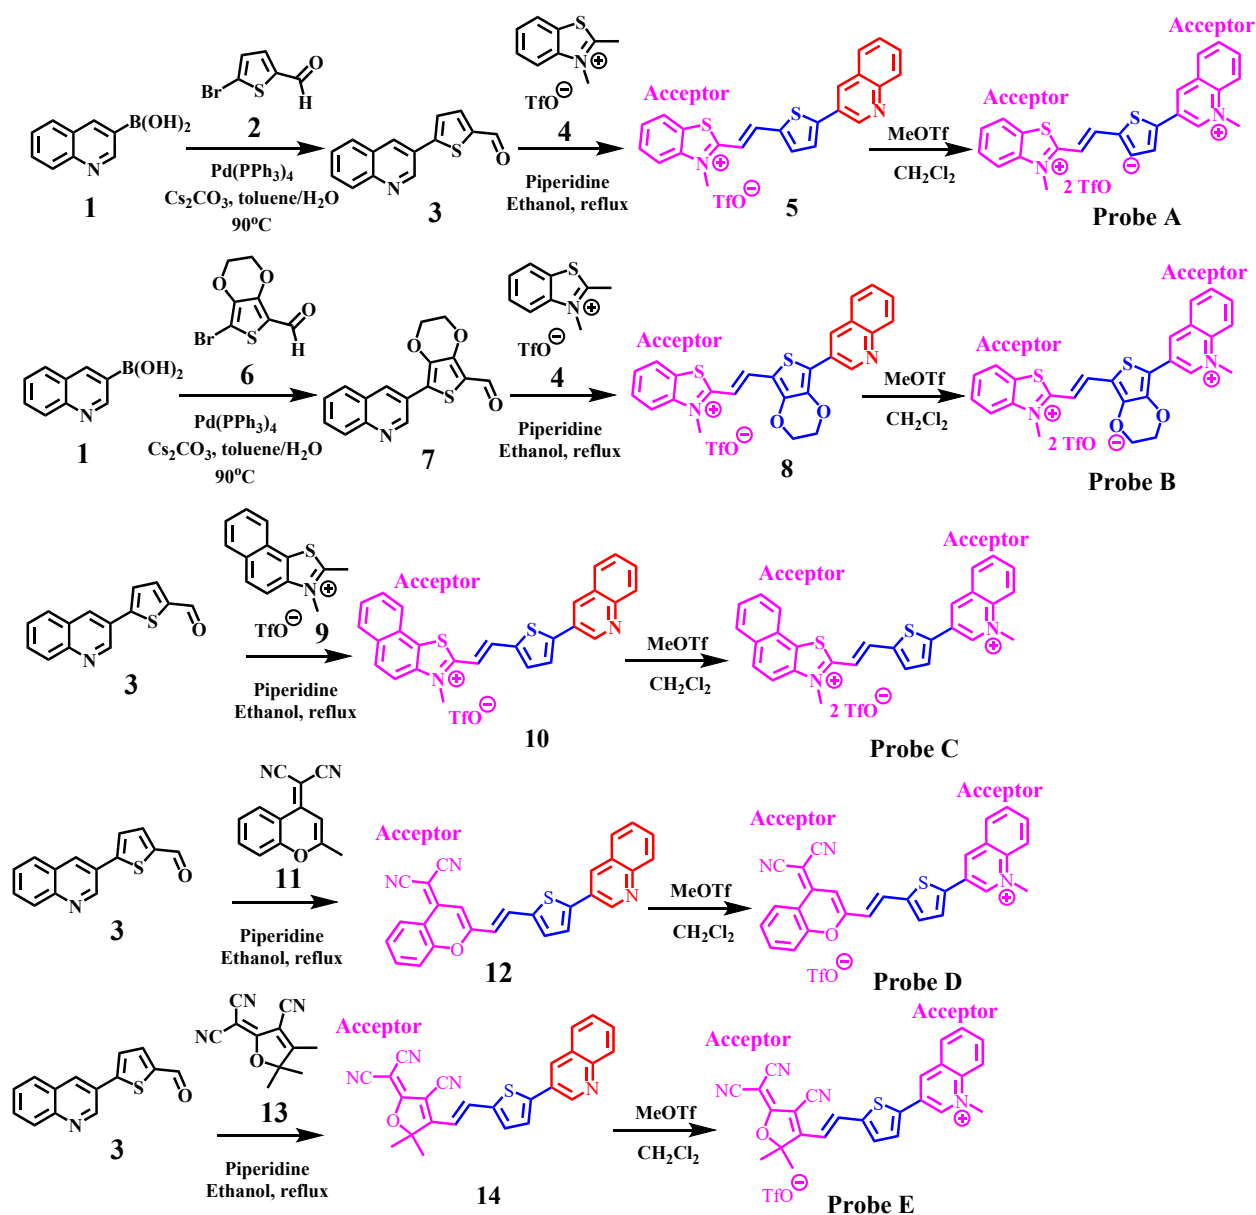

### 2.3.1 Synthesis of compound 5.

Compound **3**<sup>1</sup> (100.0 mg, 0.41 mmol) and compound **4** (130.89 mg, 0.41 mmol) were dissolved in 10 mL of ethanol, followed by the addition of a catalytic amount of piperidine (10 mol %). The resulting mixture was refluxed for 8 hours under a nitrogen atmosphere. Upon completion of the reaction (monitored by TLC), the reaction mixture was cooled down, and the solvent was evaporated under reduced pressure. Subsequently, 20 mL of cold water was added, and the mixture was subjected to extraction with dichloromethane, repeating the process 10 times. The combined organic layer was then dried over sodium sulfate. After evaporating the solvent, a crude product was obtained. To purify the crude product, column chromatography was performed using a mixture of dichloromethane and methanol as the eluent (9.5:0.5 ratio). <sup>1</sup>H NMR (500 MHz, DMSO-*d*<sub>6</sub>), δ (ppm): 4.34 (3H, s), 7.68 (1H, t, *J* = 7.5 Hz), 7.75 (3H, m), 7.87 (1H,

t,  $J = 7.5$  Hz), 8.06 (3H, m), 8.09 (1H, d,  $J = 5.0$  Hz), 8.24 (1H, d,  $J = 10.0$  Hz), 8.42 (1H, d,  $J = 10.0$  Hz), 8.48 (1H, d,  $J = 15.0$  Hz), 8.76 (1H, s), 9.36 (1H, s).

### 2.3.2. Synthesis of probe A.

Compound **5** (100.0 mg, 0.19 mmol) was dissolved in 10 mL of dichloromethane, and methyl trifluorosulfonate (1.1 equivalents) was added at room temperature. The resulting mixture was stirred under a nitrogen atmosphere for 6 hours at room temperature. A red-colored precipitate formed, which was subsequently filtered, washed with dichloromethane, and air-dried.  $^1\text{H}$  NMR (500 MHz, DMSO- $d_6$ ),  $\delta$  (ppm): 4.37 (3H, s), 4.72 (3H, s), 7.81 (3H, m), 8.10 (3H, m), 8.28 (2H, m), 8.46 (1H, d,  $J = 5.0$  Hz), 8.51 (3H, m), 9.56 (1H, s), 10.08 (1H, s).  $^{13}\text{C}$  NMR (125 MHz, DMSO- $d_6$ ),  $\delta$  (ppm): 36.90, 46.10, 114.15, 117.43, 119.77, 119.92, 122.48, 124.86, 127.46, 128.55, 129.07, 129.66, 129.87, 130.07, 131.18, 135.84, 137.87, 140.18, 141.63, 141.79, 142.57, 143.10, 148.91, 171.43.

### 2.3.3. Synthesis of compound **8**:

To initiate the reaction, compound **7**<sup>1</sup> (100.0 mg, 0.33 mmol) and compound **4** (105.37 mg, 0.33 mmol) were dissolved in 10 mL of ethanol, followed by the addition of a catalytic amount of piperidine (10 mol %). The resulting mixture was subjected to reflux for 8 hours under a nitrogen atmosphere. Once the reaction was deemed complete (monitored by TLC), the reaction mixture was allowed to cool down, and the solvent was subsequently evaporated under reduced pressure. Next, 20 mL of cold water was introduced, and the resulting solution underwent extraction with dichloromethane, repeating the process 10 times. The combined organic layer was then dried using sodium sulfate, and the solvent was evaporated, resulting in a crude product. To purify the crude product, column chromatography was performed utilizing a mixture of dichloromethane and methanol as the eluent (in a 9.5:0.5 ratio).  $^1\text{H}$  NMR (500 MHz, DMSO- $d_6$ ),  $\delta$  (ppm): 4.27 (3H, s), 4.58 (2H, t,  $J = 5.0$  Hz), 4.63 (2H, t,  $J = 5.0$  Hz), 7.53 (1H, d,  $J = 15.0$  Hz), 7.67 (1H, t,  $J = 7.5$  Hz), 7.75 (1H, t,  $J = 5.0$  Hz), 7.80 (1H, m), 7.85 (1H, t,  $J = 5.0$  Hz), 8.05 (1H, d,  $J = 5.0$  Hz), 8.09 (1H, d,  $J = 5.0$  Hz), 8.12 (1H, d,  $J = 15$  Hz), 8.21 (1H, d,  $J = 5.0$  Hz), 8.36 (1H, d,  $J = 5.0$  Hz), 8.72 (1H, s), 9.28 (1H, s).

### 2.3.4. Synthesis of probe B:

In a reaction vessel, compound **8** (100.0 mg, 0.17 mmol) was dissolved in 10 mL of dichloromethane, followed by the addition of methyl trifluorosulfonate (1.1 equivalents) at room temperature. The resulting mixture was stirred under a nitrogen atmosphere for 6 hours at room temperature, resulting in the formation of a precipitate with a red color. The precipitate was isolated by filtration, thoroughly washed with dichloromethane, and subsequently dried in ambient air.  $^1\text{H}$  NMR (500 MHz, DMSO- $d_6$ ),  $\delta$  (ppm): 4.29 (3H, s), 4.62 (2H, t,  $J = 2.5$  Hz), 4.66 (2H, t,  $J = 2.5$  Hz), 4.74 (3H, s), 7.62 (1H, d,  $J = 10.0$  Hz), 7.78 (1H, t,  $J = 7.5$  Hz), 7.87 (1H, t,  $J = 7.5$  Hz), 8.08 (1H, t,  $J = 7.5$  Hz), 8.20 (1H, d,  $J = 15.0$  Hz), 8.26 (2H, m), 8.41 (1H, d,  $J = 10.0$  Hz), 8.53 (2H, m), 9.47 (1H, s), 9.81 (1H, s).  $^{13}\text{C}$  NMR (125 MHz, DMSO- $d_6$ ),  $\delta$  (ppm): 36.54, 46.31, 65.77, 66.17, 111.75, 115.37, 116.81, 117.17, 119.72, 119.85, 122.41, 124.63, 124.97, 126.24, 128.19, 128.76, 129.57, 129.90, 131.07, 136.01, 136.68, 137.55, 141.46, 142.46, 146.55, 148.33, 171.32.

2.3.5. Synthesis of compound 10: In a 50 mL round-bottom flask, compound **3** (100.0 mg, 0.41 mmol) and Compound **9** (148.83 mg, 0.41 mmol) were combined with 10 mL of ethanol. A catalytic amount (10 mol %) of piperidine was introduced to the reaction mixture, which was subsequently refluxed for 8 hours under a nitrogen atmosphere. The progression of the reaction was tracked through TLC, and upon its completion, the reaction mixture was allowed to cool. A red-colored precipitate formed, which was then

separated by filtration and washed thrice with cold ethanol (5 mL each time). The resulting product was utilized in the subsequent step without the need for additional purification.

2.3.6. Synthesis of probe **C**: A 10 mL portion of dry dichloromethane was employed to dissolve compound **10** (100.0 mg, 0.17 mmol). Subsequently, methyl trifluoromethanesulfonate (1.1 equivalents) was introduced to the solution at room temperature under a nitrogen atmosphere, and the resulting mixture was stirred for 6 hours at room temperature. A dark-colored precipitate materialized, which was subsequently separated by filtration, washed with cold dichloromethane, and allowed to air-dry. The resulting compound was characterized by <sup>1</sup>H NMR (500 MHz, DMSO-*d*<sub>6</sub>) as follows: δ (ppm): 4.74 (3H, s), 4.82 (3H, s), 7.89 (2H, m), 8.0 (1H, d, J = 15.0 Hz), 8.13 (1H, m), 8.28 (2H, d, J = 10.0 Hz), 8.32 (3H, m), 8.46 (4H, m), 9.01 (1H, d, J = 10.0 Hz), 9.56 (1H, s), 10.14 (1H, s).

2.3.7. Synthesis of compound **12**: Synthesis of compound **12** was carried out to combine Compound **3** and compound **11** together. First, a round-bottom flask was obtained, and ethanol was added to make a 10 milliliter solution. Next, 100.0 milligrams of Compound **31** and 85.30 milligrams of Compound **11** were carefully measured out and added to the flask, giving a 0.41 molar concentration of each compound in the ethanol solution. After the compounds dissolved, a catalyst called piperidine was added in a 10 mol% amount relative to the reactants. The flask was then connected to a condenser and heated to reflux temperature while nitrogen gas gently bubbled through the solution. The reaction mixture was left to reflux for 8 hours to allow the reaction to reach completion. When finished, the flask was disconnected from the heat and allowed to slowly return to room temperature. During cooling, a dark precipitate formed from the reaction mixture. This solid was collected by vacuum filtration and washed 3 times with 5 milliliters of cold ethanol. Finally, the precipitate was isolated and used in subsequent experiments without any further processing.

2.3.8. Synthesis of probe **D**: A quantity of 100.0 mg (0.23 mmol) of Compound **12** was dissolved in 10 mL of dry dichloromethane in a reaction vessel under a nitrogen atmosphere. Methyl trifluoromethanesulfonate (1.1 equivalents relative to compound **12**) was then added slowly at room temperature, and the reaction mixture was stirred for 6 hours. Over this time, a dark colored precipitate formed. The solid was collected by vacuum filtration, washed with cold dichloromethane, and allowed to dry under ambient conditions. The isolated product was characterized by <sup>1</sup>H NMR (500 MHz, DMSO-*d*<sub>6</sub>): δ 4.69 (3H, s), 7.07 (1H, s), 7.28 (1H, d, J = 15.0 Hz), 7.55 (1H, t, J = 7.5 Hz), 7.74 (2H, t, J = 5.0Hz), 7.89 (3H, m), 8.04 (1H, t, J = 7.5 Hz), 8.22 (1H, t, J = 7.5 Hz), 8.44 (2H, m), 8.64 (2H, d, J = 10.0 Hz), 9.37 (1H, s), 9.97 (1H, s); <sup>13</sup>C NMR (125 MHz, DMSO-*d*<sub>6</sub>): δ 45.98, 61.20, 107.67, 116.13, 117.30, 117.46, 119.41, 119.52, 120.32, 124.90, 126.60, 127.61, 129.43, 129.53, 130.79, 130.88, 131.08, 132.99, 135.92, 137.41, 139.36, 14058, 143.27, 148.29, 152.25, 152.86, 157.55.

2.3.9. Synthesis of compound **14**: A reaction was carried out between compound **3** (100.0 mg, 0.41 mmol) and compound **13** (81.61 mg, 0.41 mmol) in a 50 mL round bottom flask containing 10 mL of ethanol. The two compounds were dissolved completely in the ethanol solvent before adding a catalytic quantity of piperidine (10 mol% relative to the reactants) to the flask. The reaction mixture was then fitted with a condenser and refluxed at the solvent's boiling point for 8 hours under a nitrogen atmosphere to avoid side reactions. After the allotted reaction time, the flask was removed from heat and allowed to cool to room temperature. During cooling, a dark colored precipitate formed which was collected via vacuum filtration. The solid was washed three times with 5 mL portions of cold ethanol and isolated. The purified product was carried on without additional processing for use in subsequent reactions.

2.3.10. Synthesis of probe E: A quantity of 100.0 mg (0.23 mmol) of compound **14** was dissolved in 10 mL of anhydrous dichloromethane within a reaction vessel under a nitrogen atmosphere. Methyl trifluoromethanesulfonate (equivalent to 1.1 times the molar amount of compound **14**) was gently added at room temperature, and the reaction mixture was stirred for a duration of 6 hours. During this period, a dark-colored precipitate materialized. The precipitate was isolated via vacuum filtration, washed with cold dichloromethane, and left to dry under ambient conditions. The resulting product was subjected to analysis by <sup>1</sup>H NMR (500 MHz, DMSO-*d*<sub>6</sub>): δ 1.86 (6H, s), 4.72 (3H, s), 9.93 (1H, d, J = 20.0 Hz), 8.0 (3H, m), 8.21 (2H, m), 8.48 (2H, m), 9.56 (1H, s), 10.17 (1H, s); <sup>13</sup>C NMR (125 MHz, DMSO-*d*<sub>6</sub>): δ 25.84, 45.93, 55.00, 99.63, 100.78, 111.17, 112.35, 113.09, 115.52, 119.66, 119.83, 122.39, 127.21, 129.59, 129.87, 131.09, 136.07, 137.36, 137.80, 139.67, 141.68, 142.69, 142.79, 148.78, 174.56, 177.12.

## 2.4. NMR and Mass Spectra of Fluorescent Probes.

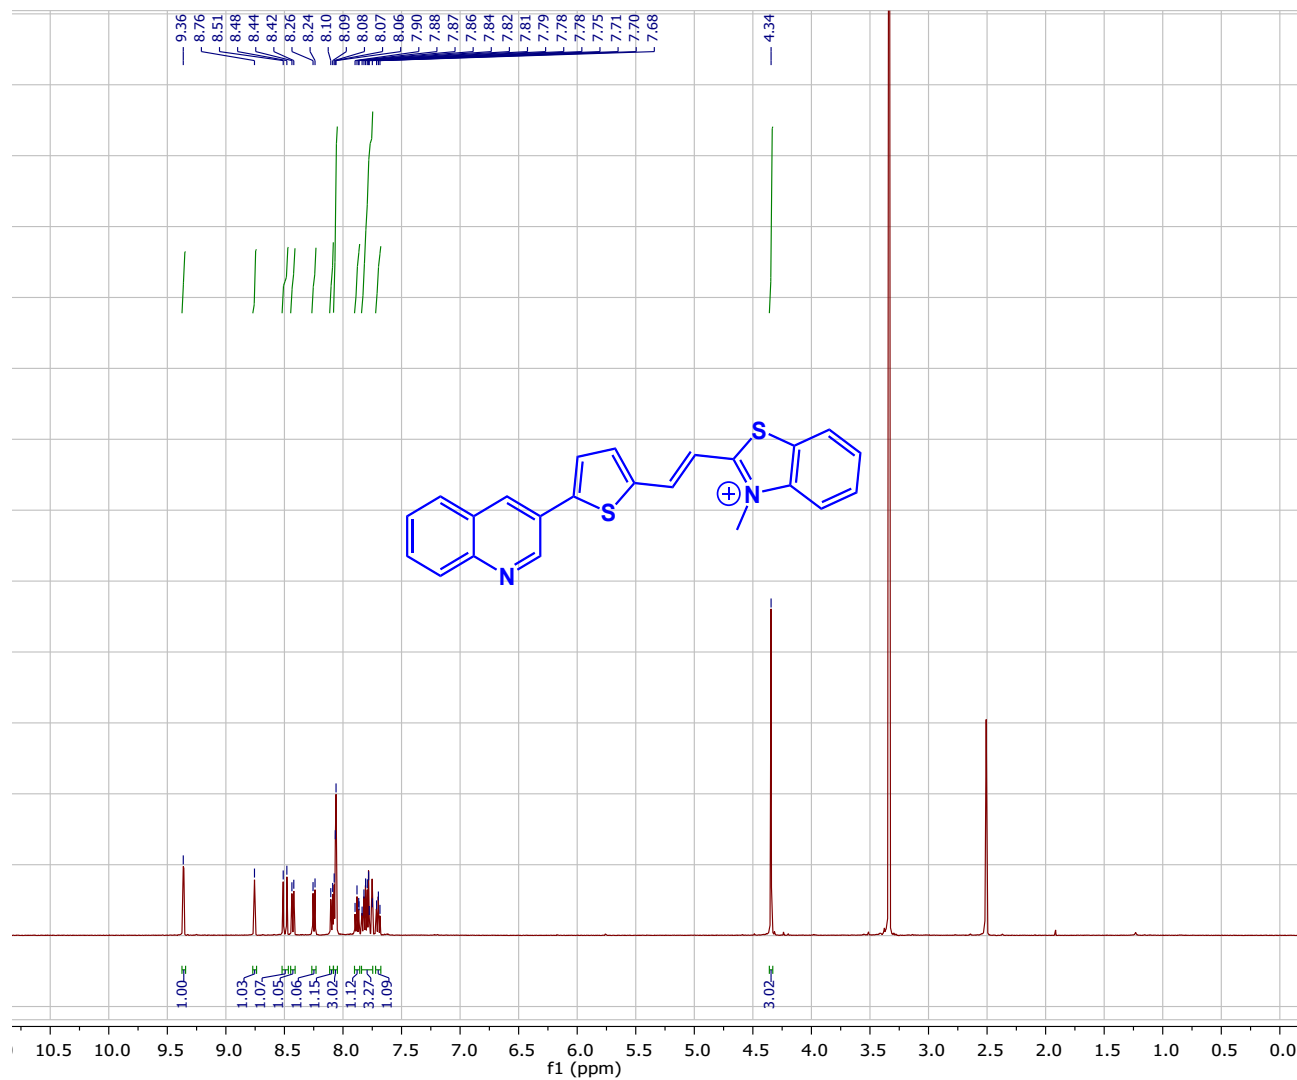

**Figure S1:**  $^1\text{H}$  NMR spectrum of compound **5** in  $\text{DMSO-}d_6$  solution.

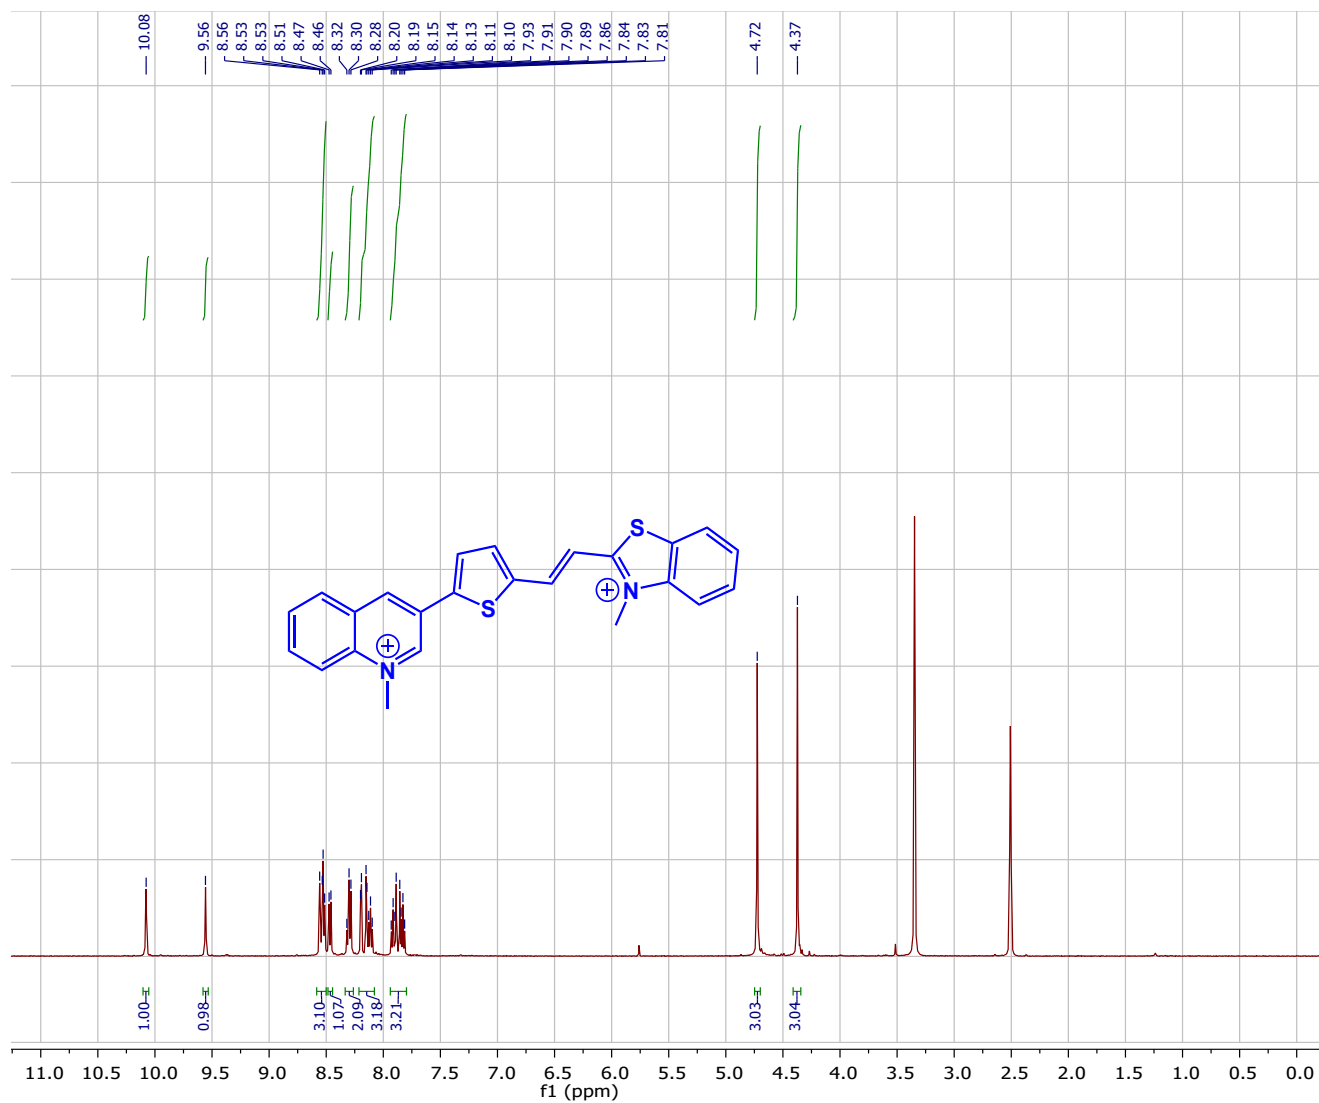

Figure S2:  $^1\text{H}$  NMR spectrum of probe A in  $\text{DMSO-}d_6$  solution.



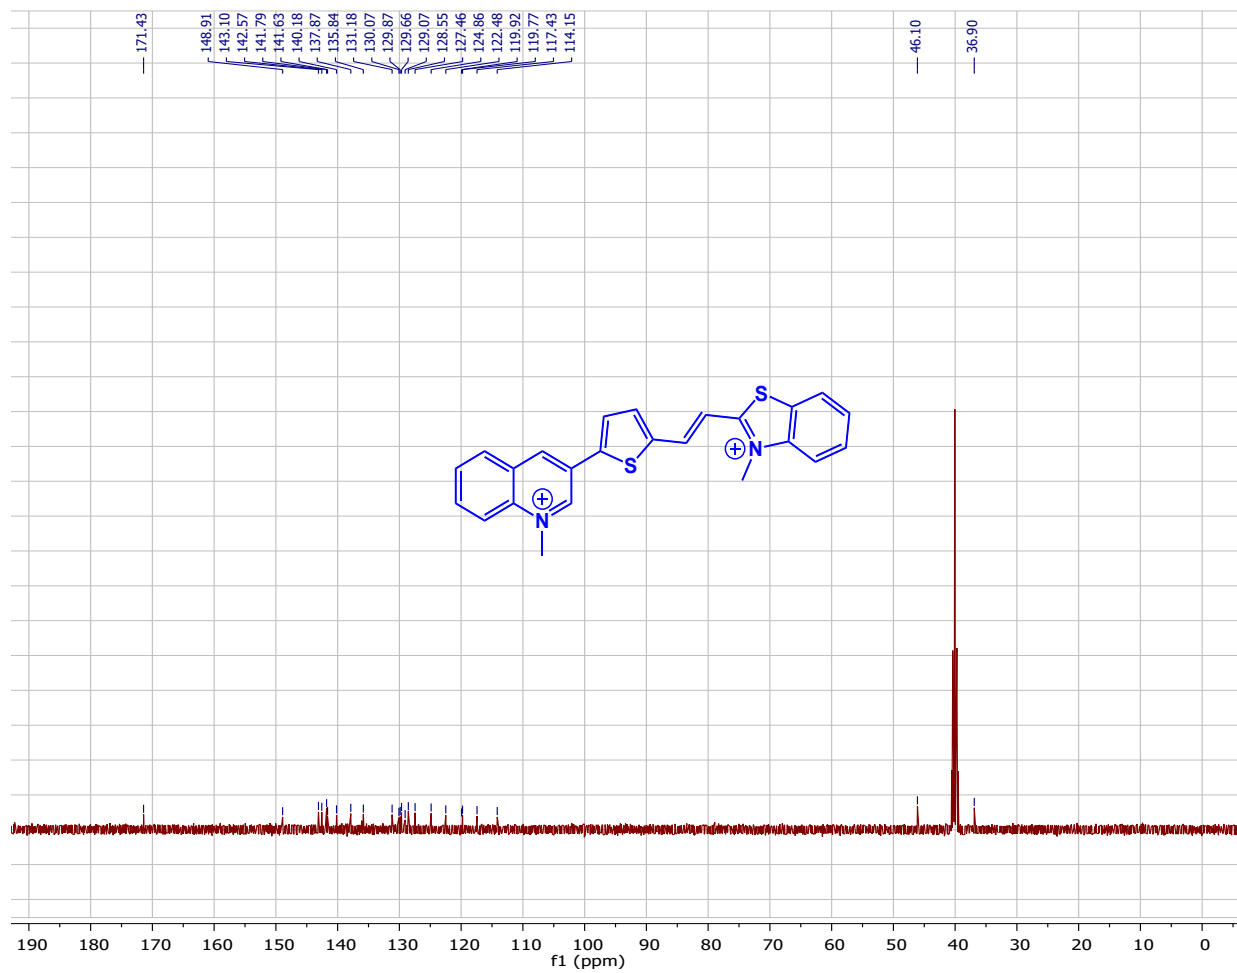

Figure S3:  $^{13}\text{C}$  NMR spectrum of probe A in  $\text{DMSO-}d_6$  solution.

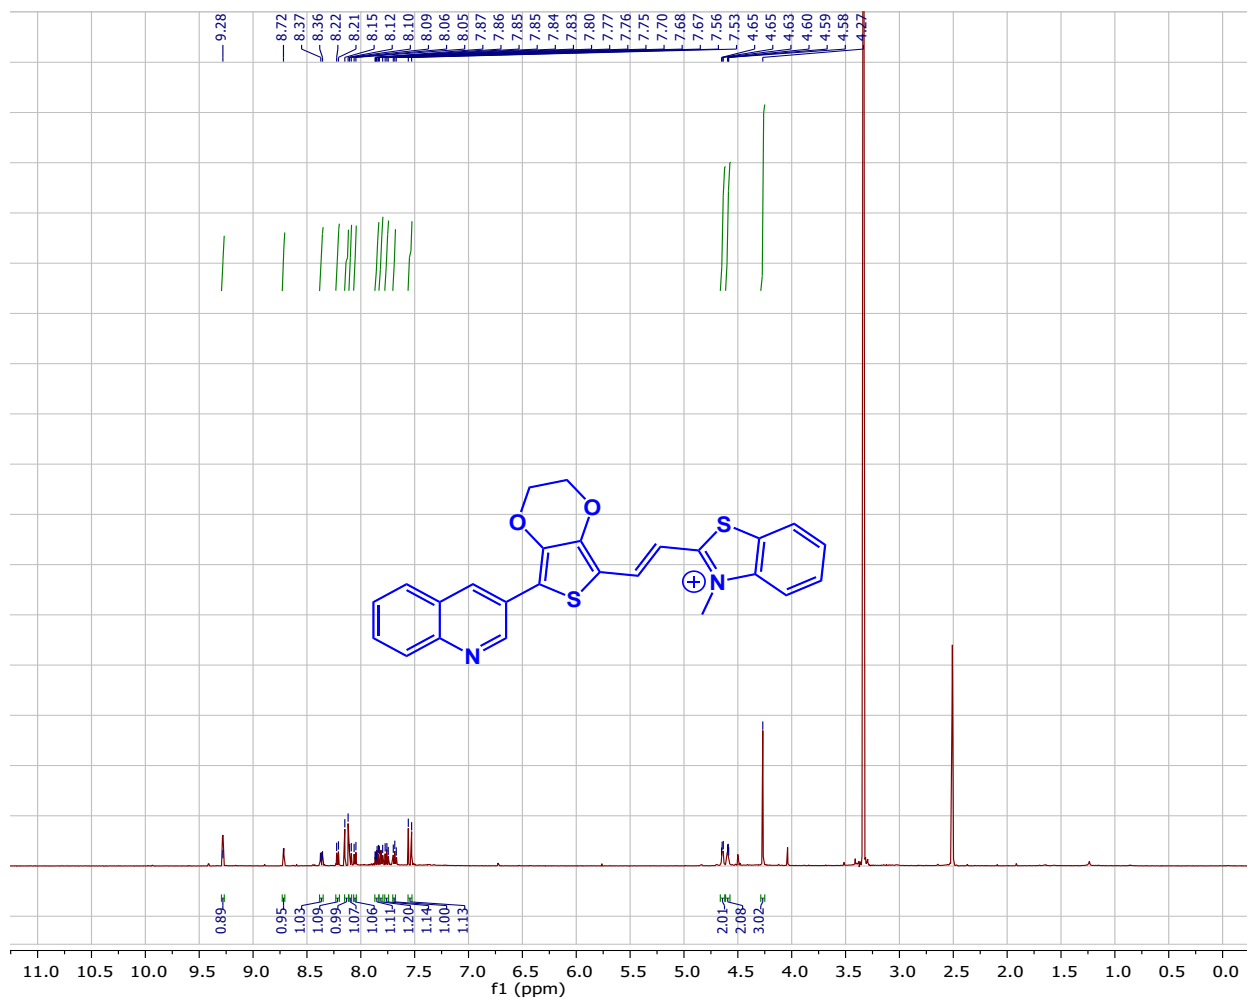

Figure S4: <sup>1</sup>H NMR spectrum of compound 8 in DMSO-d<sub>6</sub> solution

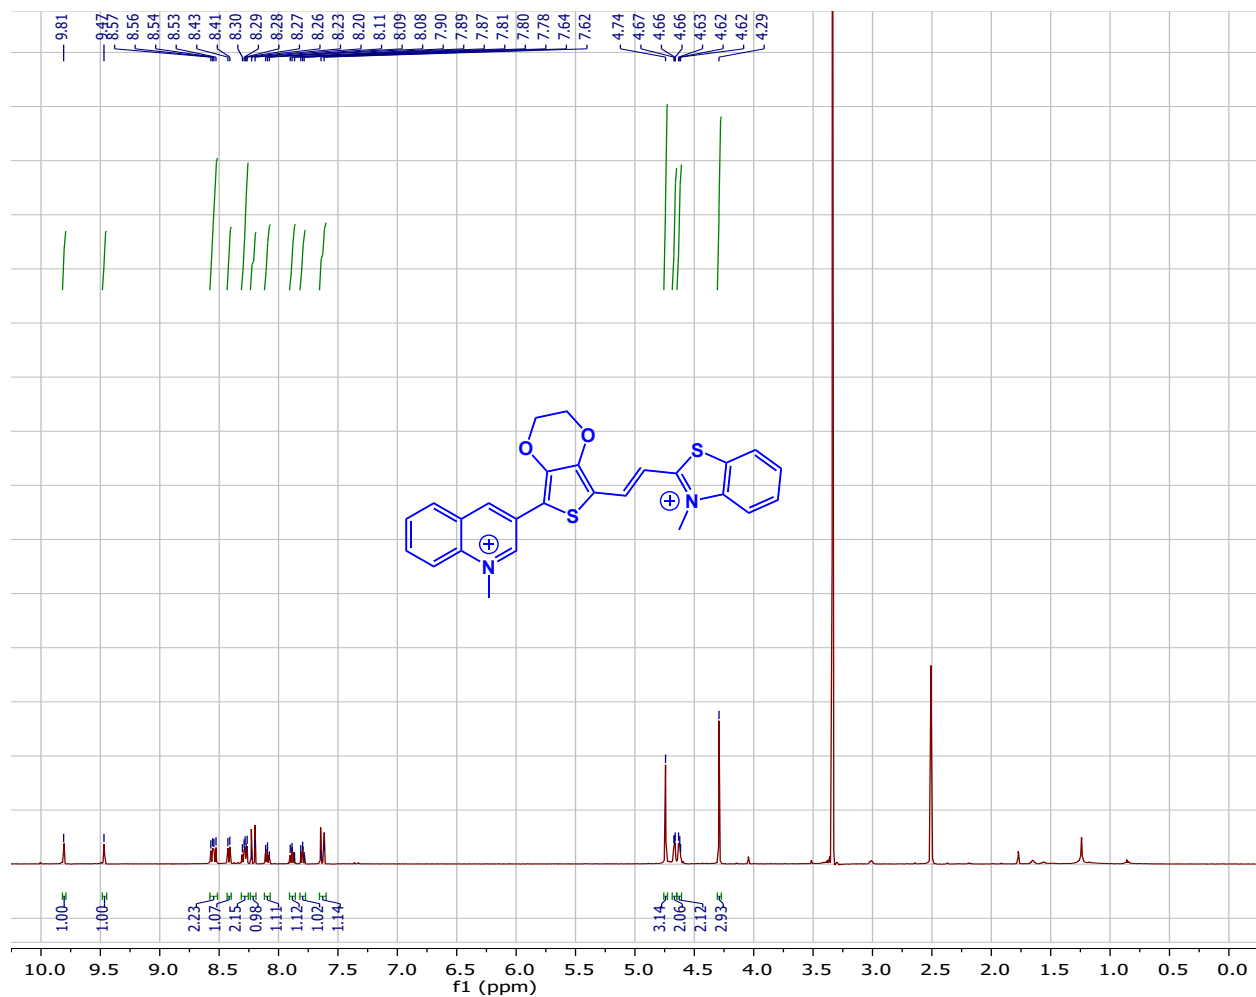

Figure S5:  $^{13}\text{C}$  NMR spectrum of probe B in  $\text{DMSO-}d_6$  solution.

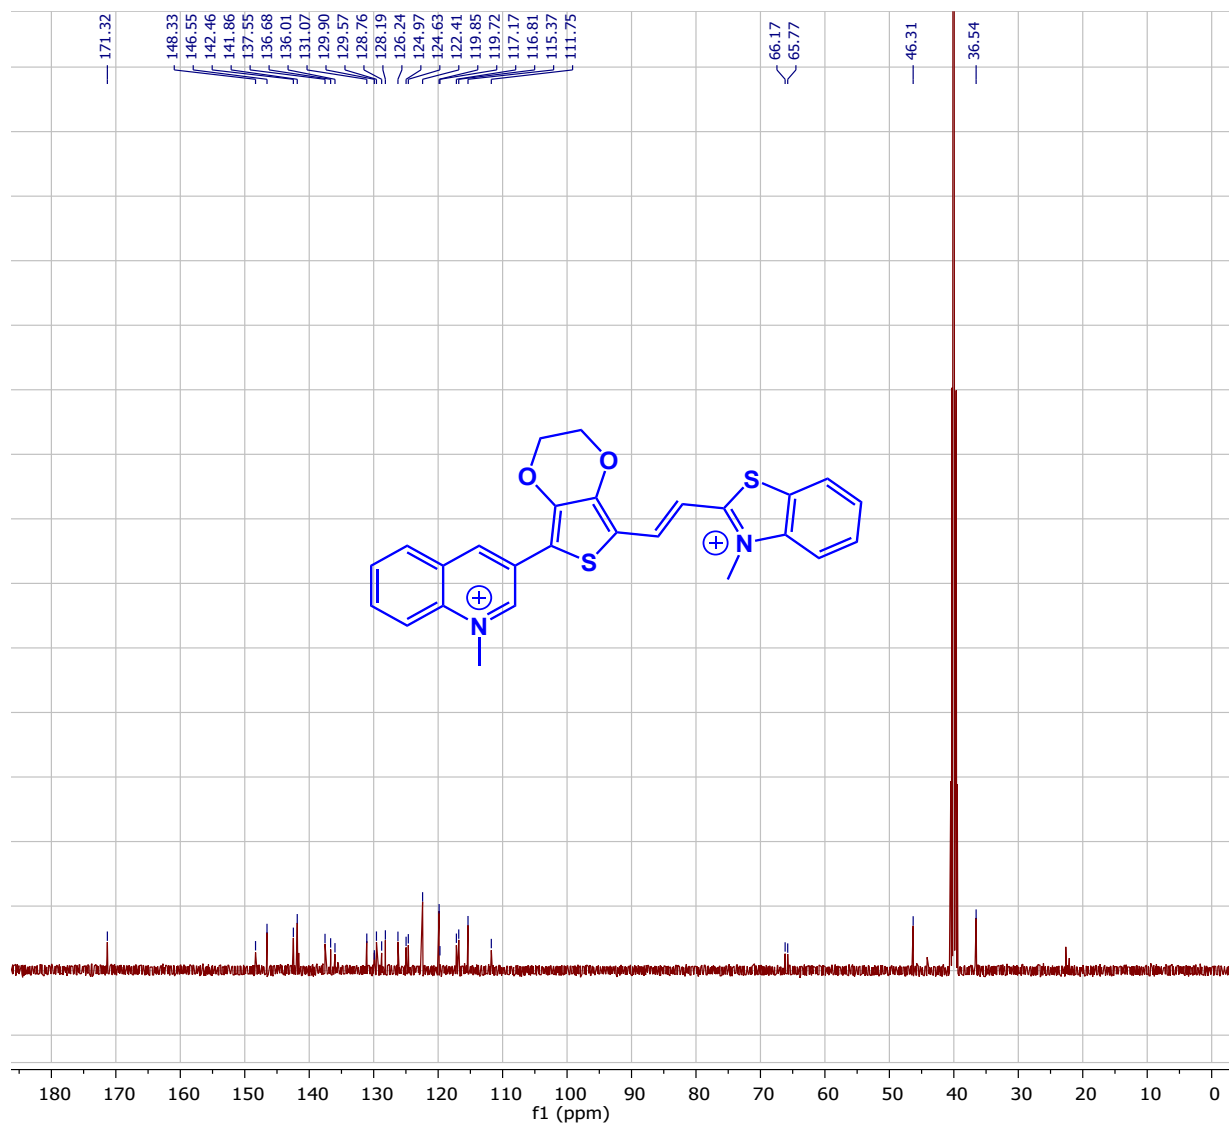

Figure S6:  $^{13}\text{C}$  NMR spectrum of probe B in  $\text{DMSO-}d_6$  solution.

90602ESIPN3 #1478-1548 RT: 8.10-8.50 AV: 71 SB: 218 7.27-7.85 , 8.89-9.54 NL: 3.68E7  
T: FTMS + p ESI Full ms [100.0000-1000.0000]

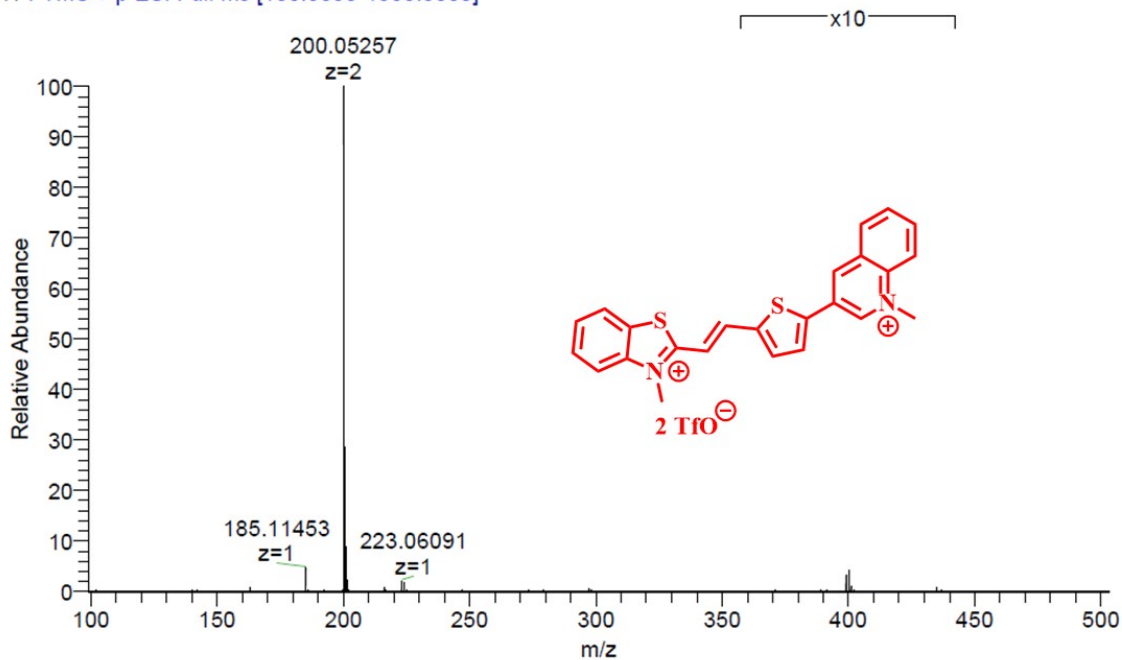

90602ESIPN3#1478-1548 RT: 8.10-8.50 AV: 71  
SB: 218 7.27-7.85 , 8.89-9.54  
T: FTMS + p ESI Full ms [100.0000-1000.0000]  
m/z= 100.00000-503.13587

| m/z       | Intensity  | Relative | Charge | Theo. Mass | Delta (ppm) | Composition                                                   |
|-----------|------------|----------|--------|------------|-------------|---------------------------------------------------------------|
| 200.05257 | 38098336.0 | 100.00   | 2.00   | 200.05285  | -1.40       | C <sub>24</sub> H <sub>20</sub> N <sub>2</sub> S <sub>2</sub> |

Figure S7: HRMS spectrum of probe A.

90604ESIPN3 #1708 RT: 9.38 AV: 1 NL: 9.61E8  
T: FTMS + p ESI Full ms [100.0000-1000.0000]

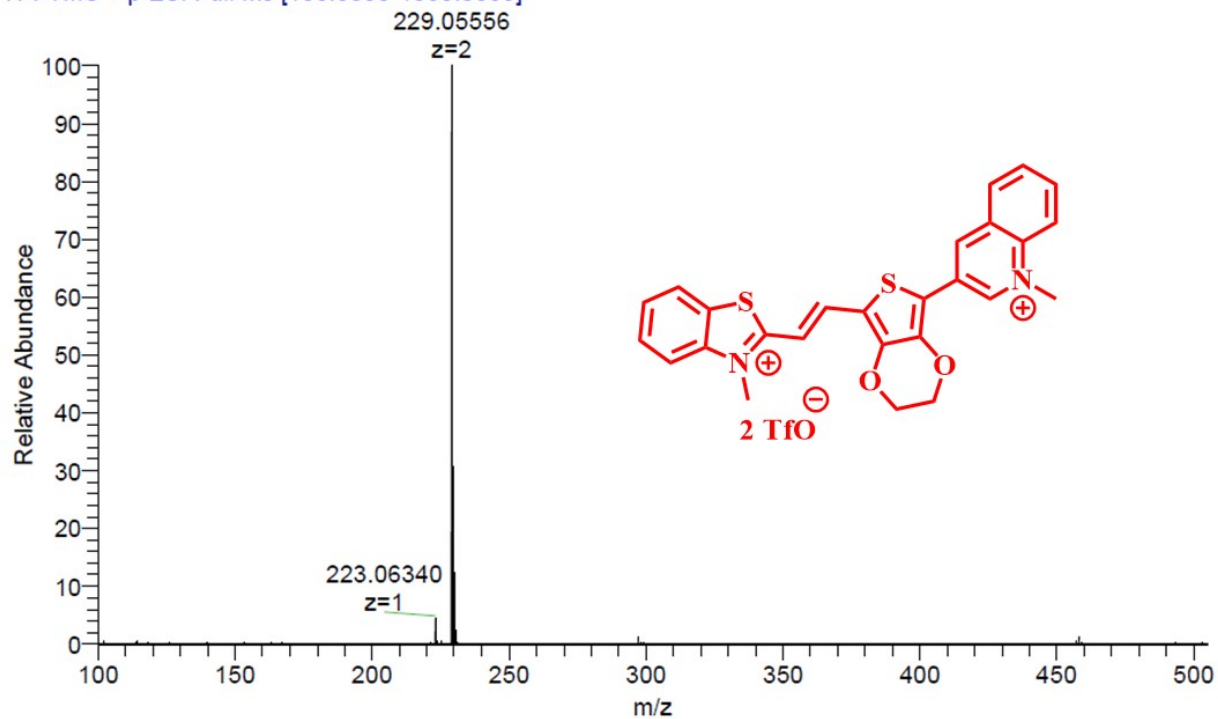

90604ESIPN3#1708 RT: 9.38

T: FTMS + p ESI Full ms [100.0000-1000.0000]

m/z= 100.00000-504.89345

| m/z       | Intensity    | Relative | Charge | Theo. Mass | Delta (ppm) | Composition                                                                  |
|-----------|--------------|----------|--------|------------|-------------|------------------------------------------------------------------------------|
| 229.05556 | 1023466752.0 | 100.00   | 2.00   | 229.05559  | -0.13       | C <sub>26</sub> H <sub>22</sub> O <sub>2</sub> N <sub>2</sub> S <sub>2</sub> |

Figure S8: HRMS spectrum of probe B.

90605ESIPN2#9-17 RT: 0.12-0.24 AV: 5 SB: 20 0.01-0.12, 0.55-0.95 NL: 3.69E7  
T: FTMS + p ESI Full ms [120.0000-1500.0000]

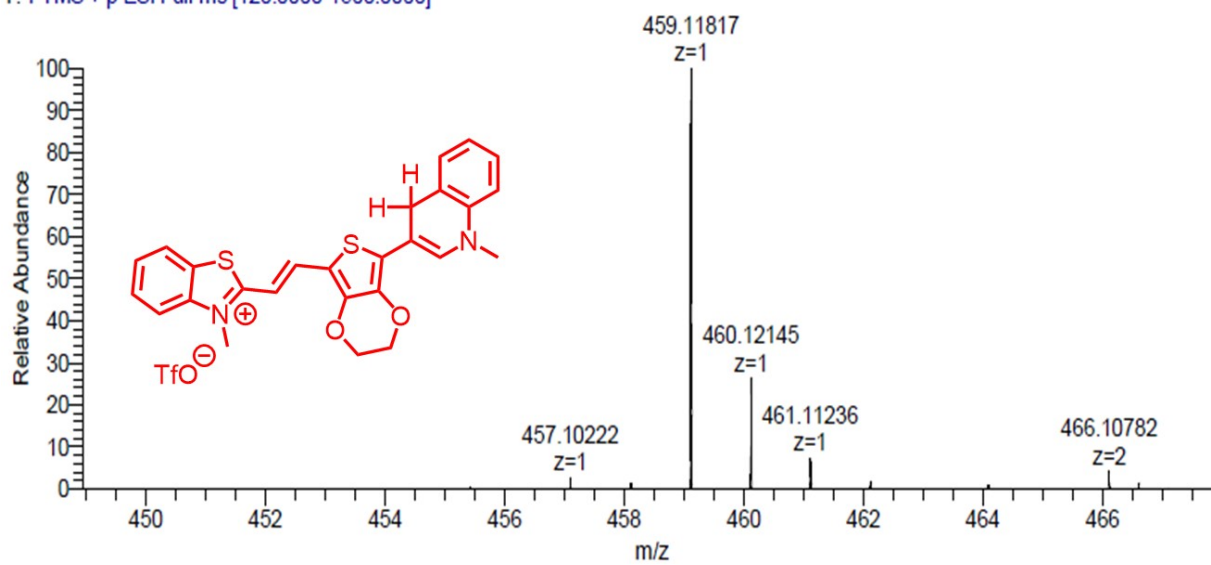

90605ESIPN2#9-17 RT: 0.12-0.24 AV: 5  
SB: 20 0.01-0.12, 0.55-0.95  
T: FTMS + p ESI Full ms [120.0000-1500.0000]  
m/z= 448.94035-467.98057

| m/z       | Intensity  | Relative | Charge | Theo. Mass | Delta (ppm) | Composition                                                                  |
|-----------|------------|----------|--------|------------|-------------|------------------------------------------------------------------------------|
| 459.11817 | 37055484.0 | 100.00   | 1.00   | 459.11955  | -3.00       | C <sub>26</sub> H <sub>23</sub> O <sub>2</sub> N <sub>2</sub> S <sub>2</sub> |

Figure S9: HRMS spectrum of probe BH.

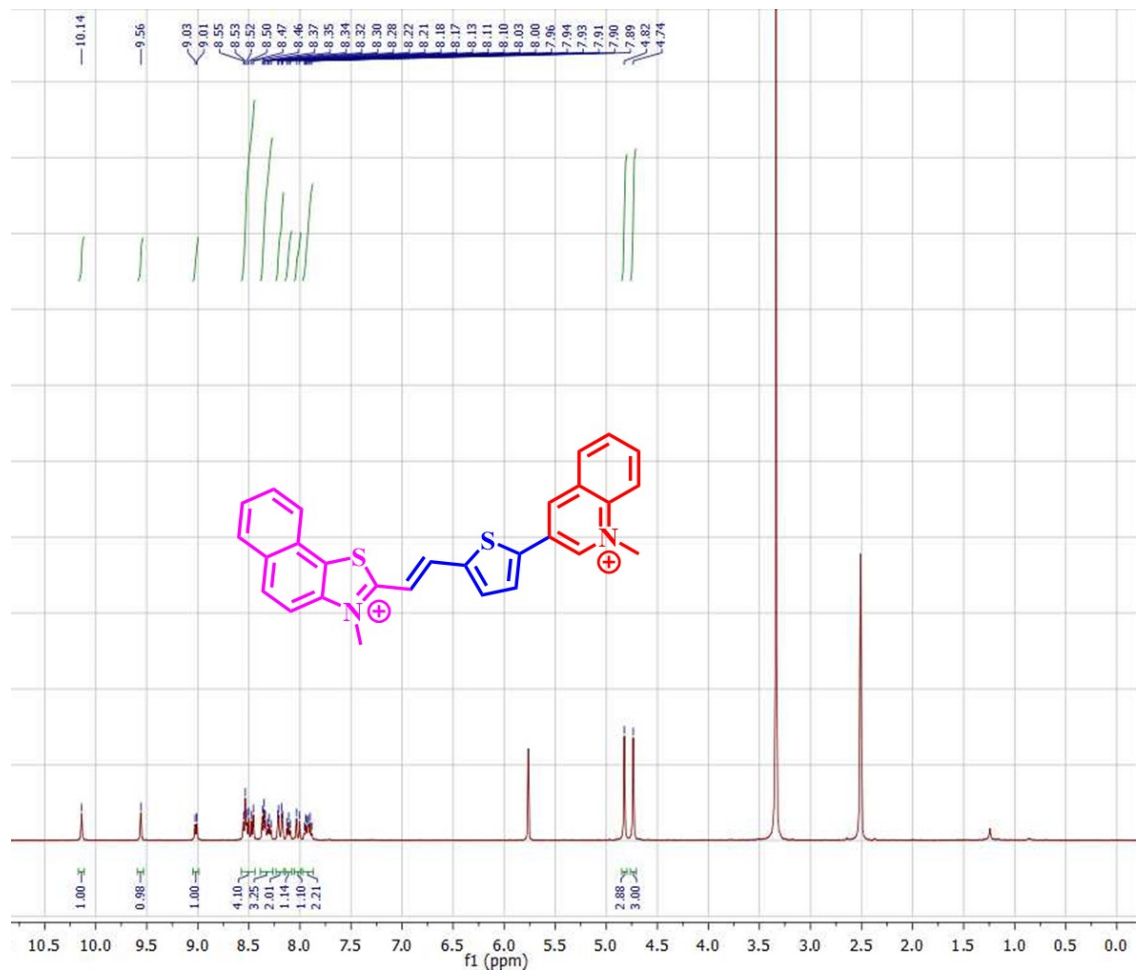

Figure S10:  $^1\text{H}$  NMR spectrum of probe C in  $\text{DMSO-}d_6$  solution.



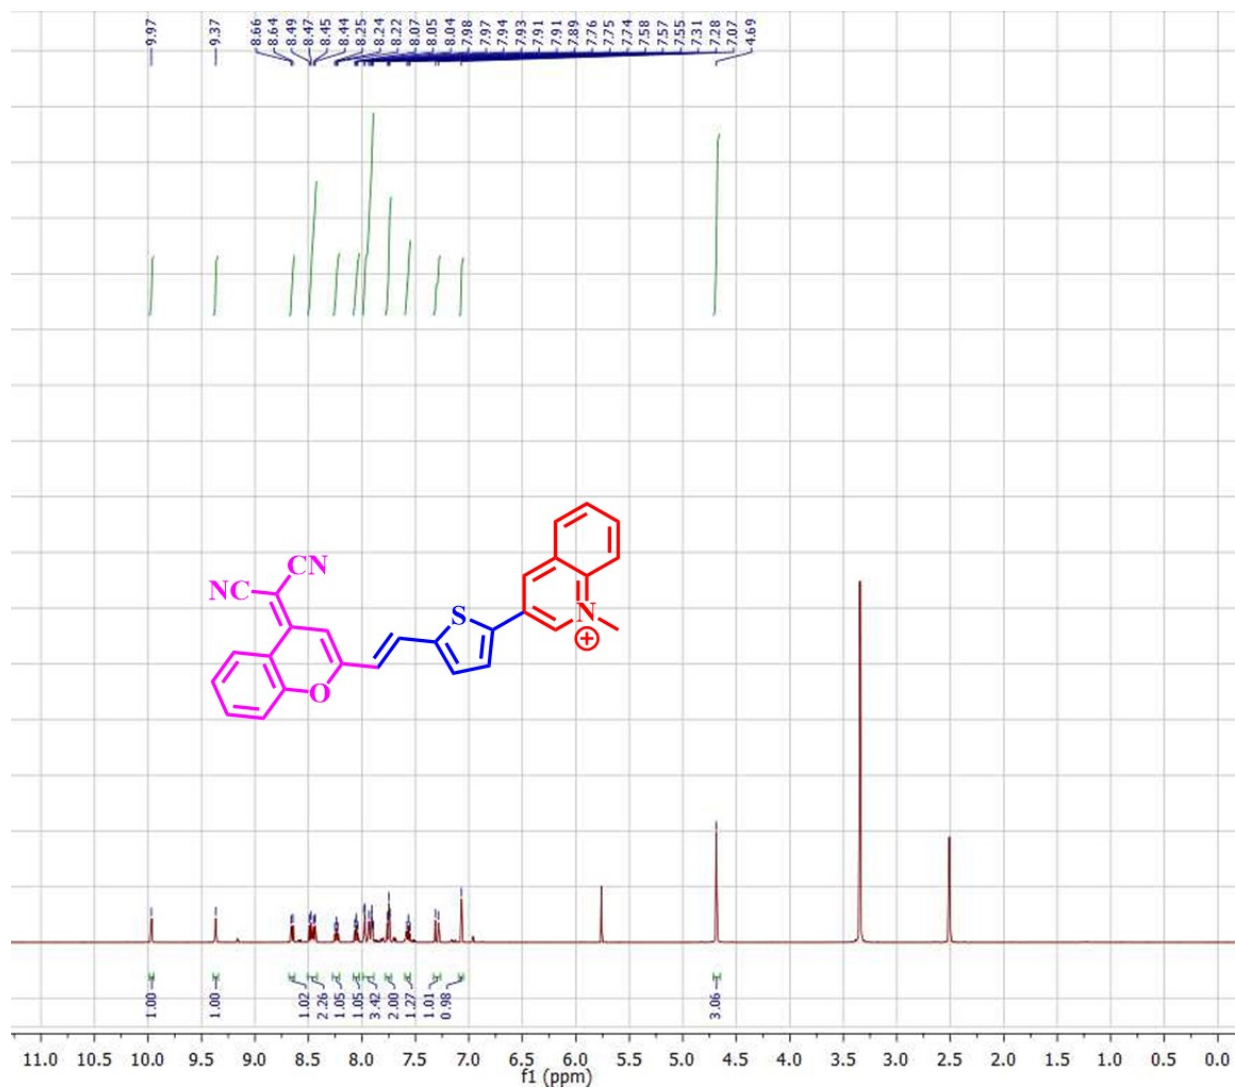

Figure S11:  $^1\text{H}$  NMR spectrum of probe D in  $\text{DMSO-}d_6$  solution.

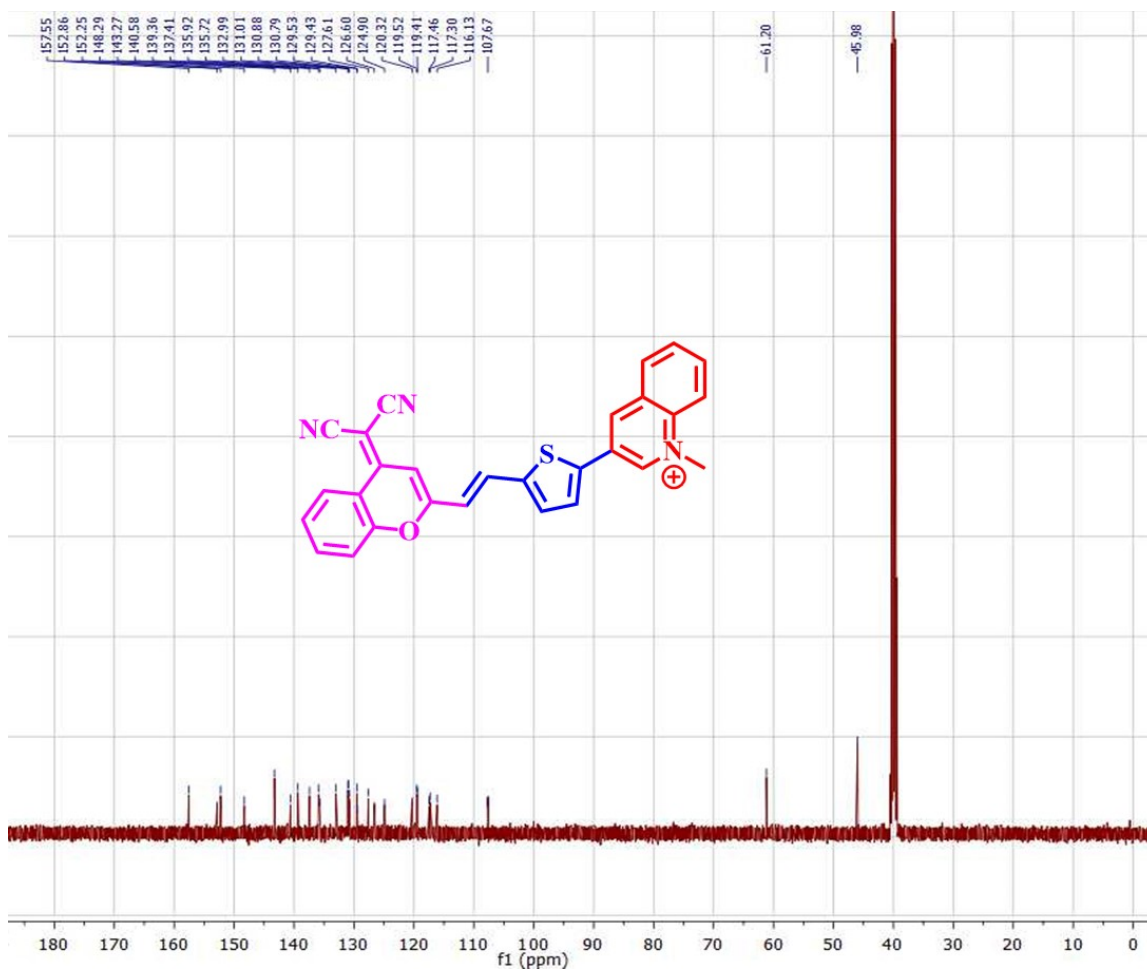

Figure S12:  $^{13}\text{C}$  NMR spectrum of probe D in  $\text{DMSO-}d_6$  solution.

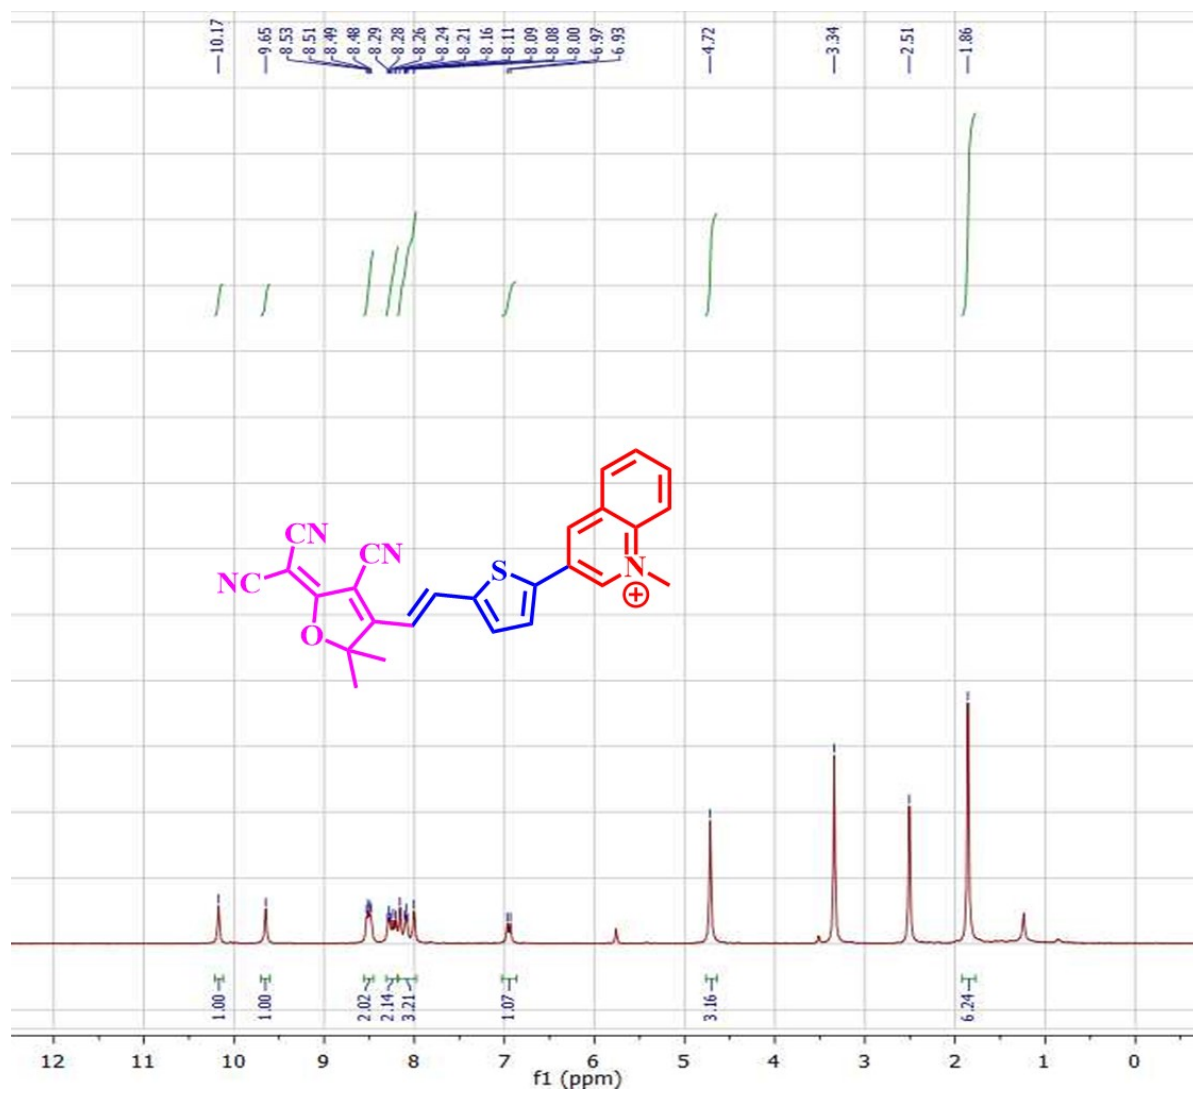

Figure S13: <sup>1</sup>H NMR spectrum of probe E in DMSO-d<sub>6</sub> solution.

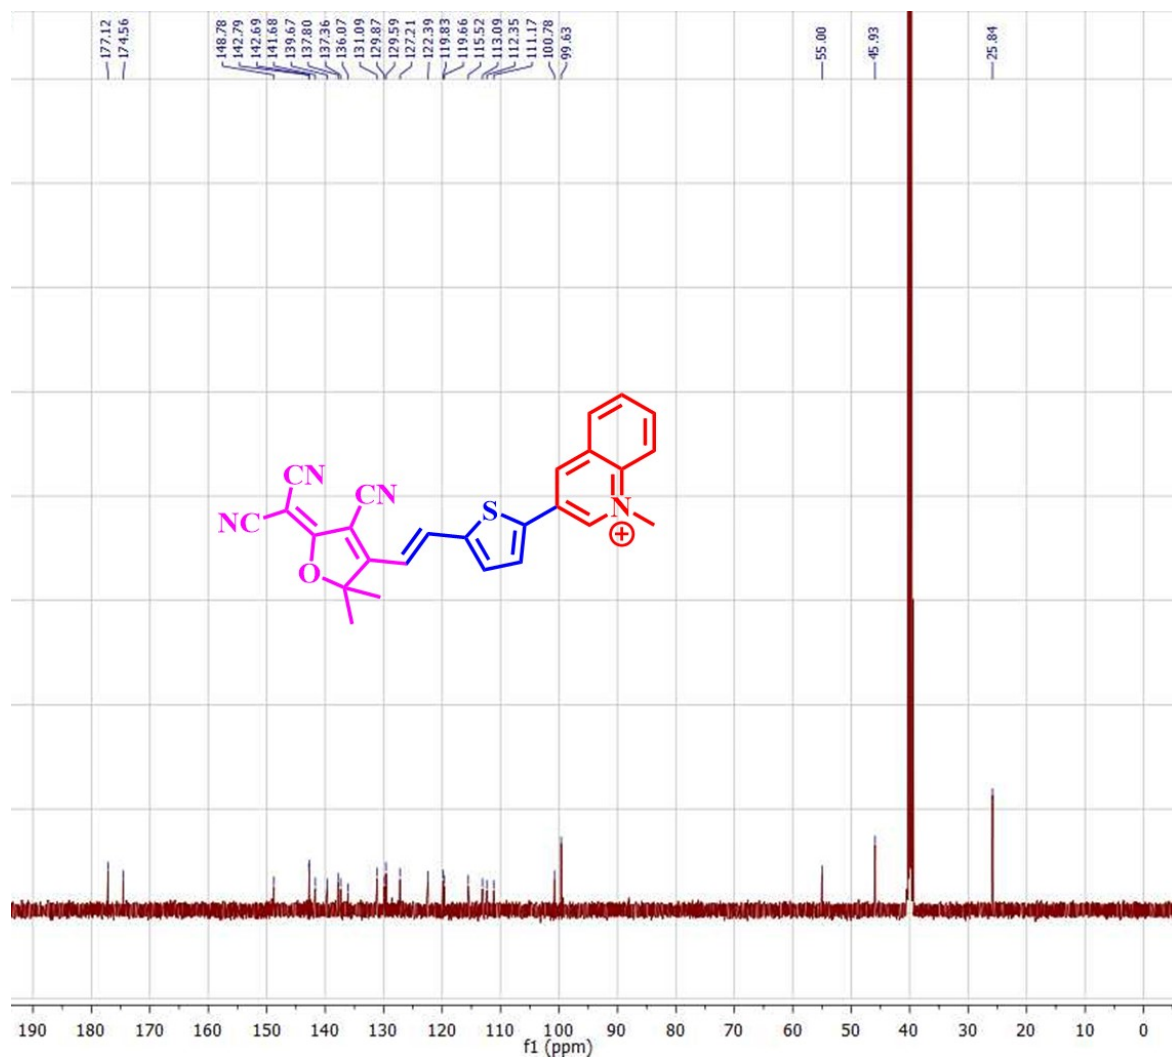

Figure S14:  $^{13}\text{C}$  NMR spectrum of probe E in  $\text{DMSO-}d_6$  solution.

## 2.5. Optical Properties of Fluorescent Probes.

### 2.5.1. The linear fluorescence responses of probes to NADH

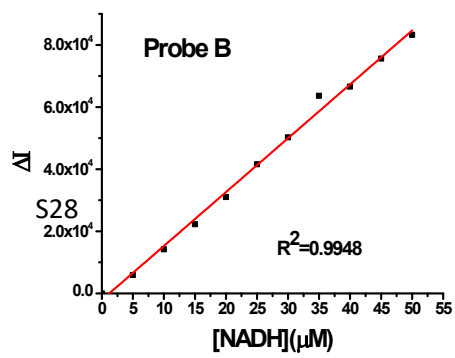

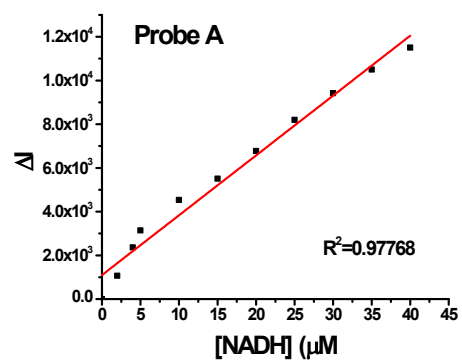

**LOD for probe A = 0.151  $\mu\text{M}$**

**LOD for probe B = 0.073  $\mu\text{M}$**

**Figure S15:** Fluorescence intensity changes of probes **A** (left) and **B** (right) (10  $\mu\text{M}$ ) with different concentration of NADH (0-50  $\mu\text{M}$ ). Probes **A** and **B** possess a detection limit of 0.151  $\mu\text{M}$  and 0.073  $\mu\text{M}$ , respectively.

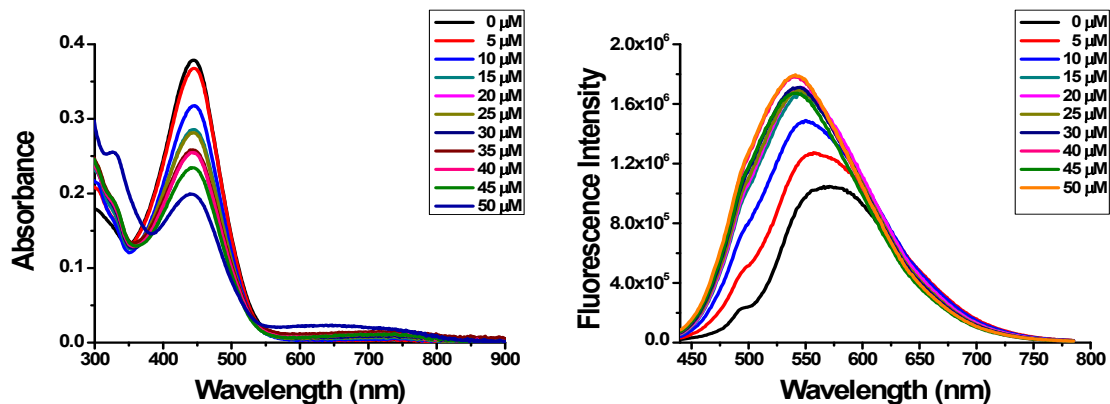

**Figure S16:** Absorbance and emission spectra of probe C (10  $\mu\text{M}$ ) upon exposure to varying NADH concentrations (0-50  $\mu\text{M}$ ) in PBS buffer (pH 7.4) with 10% DMSO during a 4-hour incubation period, observed under excitation at 420 nm.

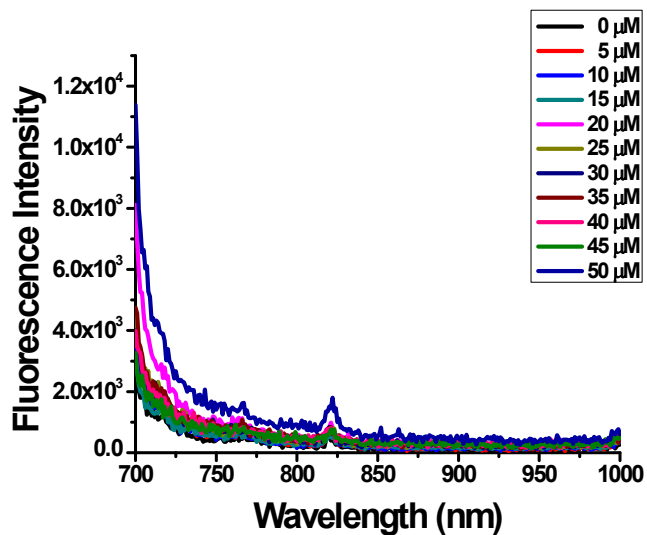

**Figure S17:** Absorbance and emission spectra of probe C (10  $\mu\text{M}$ ) in response to various NADH concentrations (0-50  $\mu\text{M}$ ) in PBS buffer (pH 7.4) with 10% DMSO during a 4-hour incubation period, acquired under excitation at 680 nm.

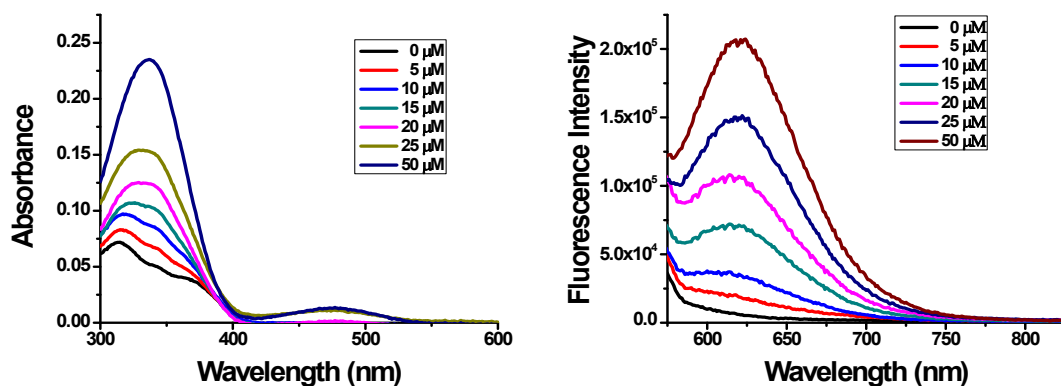

**Figure S18:** Absorbance and emission spectra of probe **D** (10  $\mu\text{M}$ ) in response to varying NADH concentrations (0-50  $\mu\text{M}$ ) in PBS buffer (pH 7.4) with 10% DMSO, recorded during a 4-hour incubation period and excited at 480 nm.

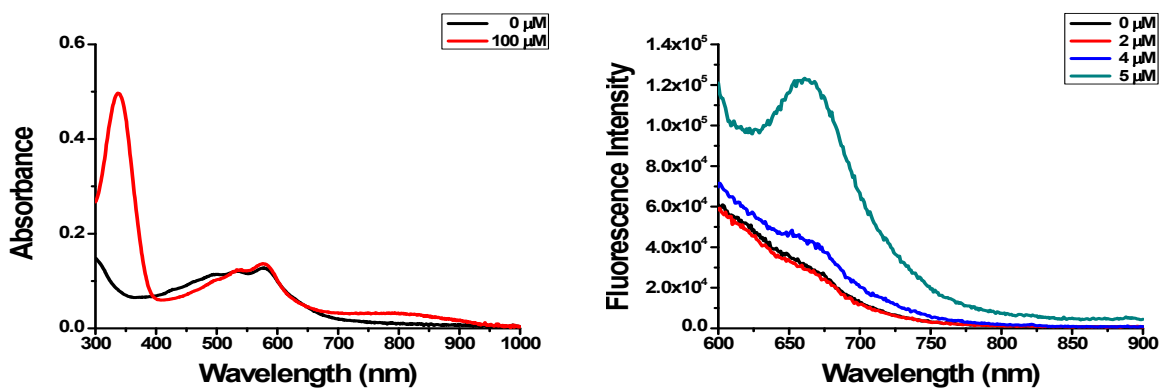

**Figure S19:** Absorbance and emission spectra of Probe **E** (10  $\mu\text{M}$ ) in response to different NADH concentrations (0, 2, 4, and 6  $\mu\text{M}$ ) in PBS buffer (pH 7.4) with 10% DMSO. These spectra were recorded during a 2-hour incubation period and excited at 480 nm.

### 2.5.2. The probe selectivity

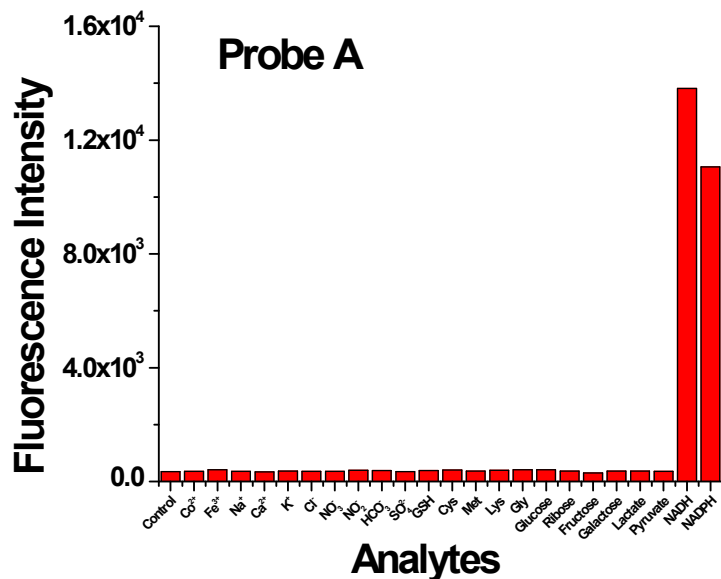

**Figure S20:** Fluorescence responses of 10  $\mu\text{M}$  probe **A** to various biomolecules (100  $\mu\text{M}$ ), NADH (50  $\mu\text{M}$ ) and NADPH (50  $\mu\text{M}$ ) under excitation at 630 nm.

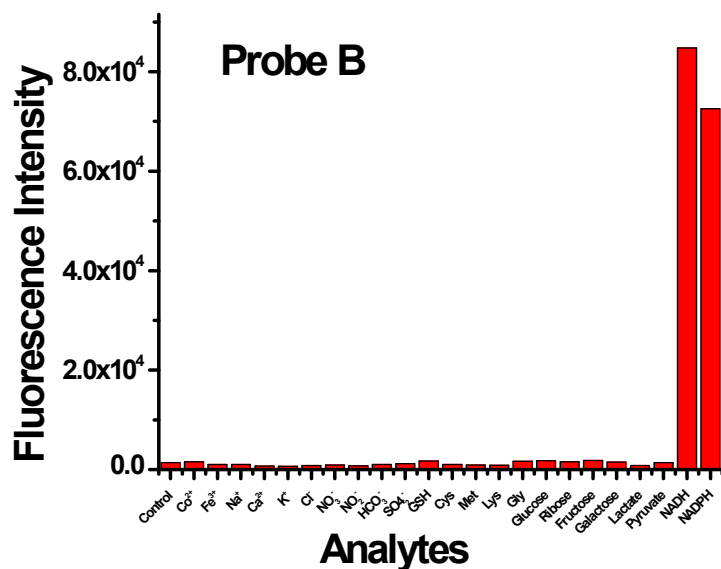

**Figure S21:** Fluorescence responses of 10  $\mu\text{M}$  probe **B** to various biomolecules (100  $\mu\text{M}$ ), NADH (50  $\mu\text{M}$ ) and NADPH (50  $\mu\text{M}$ ) under excitation at 630 nm.



### 1.5.3. Photostability of the probes.

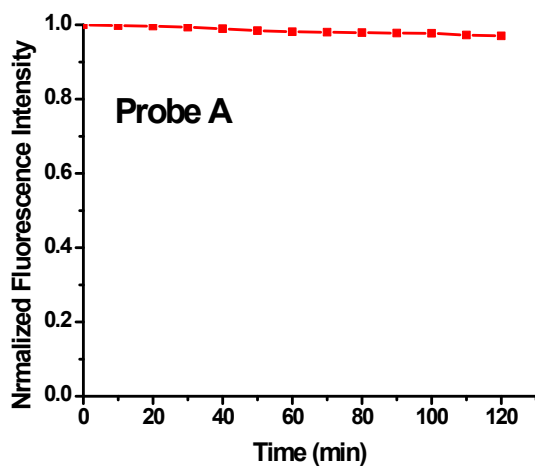

**Figure S22:** The fluorescence intensity of 10  $\mu\text{M}$  probe **A** was measured over time when excited at 630 nm in the presence of 50  $\mu\text{M}$  NADH.

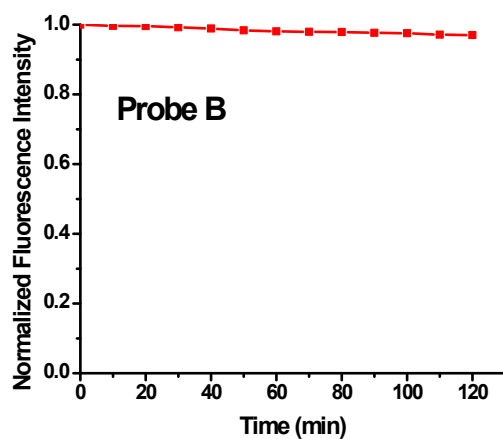

**Figure S23:** The fluorescence intensity of 10  $\mu\text{M}$  probe **B** was measured over time when excited at 630 nm in the presence of 50  $\mu\text{M}$  NADH.

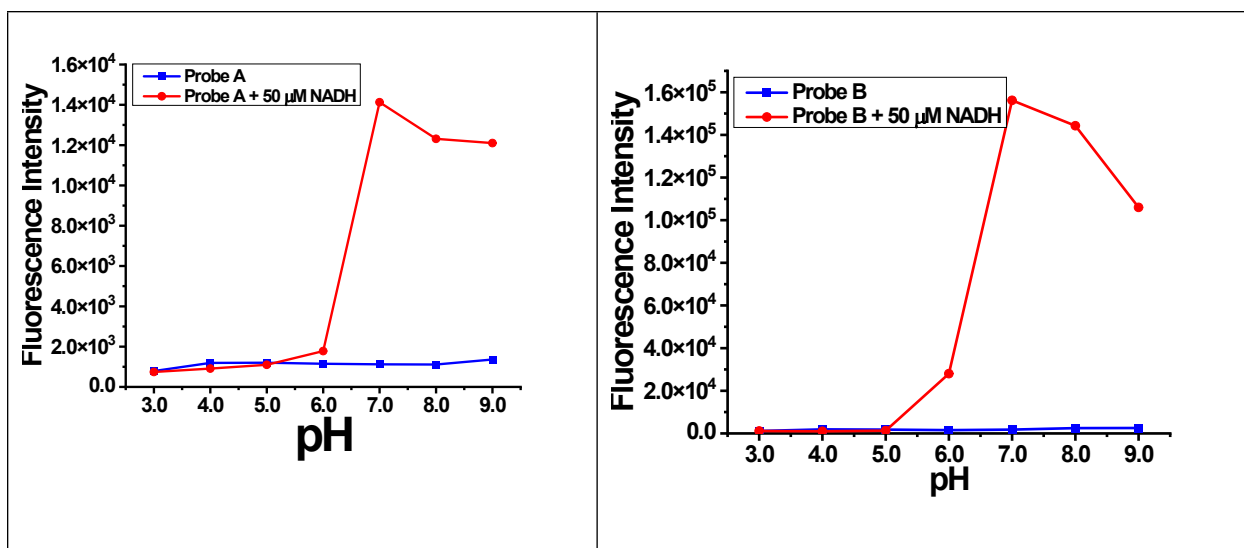

**Figure S24:** The impact of pH on fluorescence intensity is shown for Probes A (left) and B (right) within various pH PBS buffers, with 10% DMSO, both in the absence and presence of 50  $\mu\text{M}$  NADH.

In the absence of NADH, the fluorescence probe demonstrated a consistent behavior, with no discernible pH dependency. This constancy stemmed from the presence of two electron-withdrawing acceptor groups within the probe's structure, as depicted in Figure S25. However, as the pH transitioned to neutral or slightly basic conditions, the probe exhibited a marked increase in fluorescence intensity in response to the presence of NADH. In contrast, at acidic pH levels, the probe's fluorescence response weakened. This diminished response was attributed to the protonation of the 1-methyl-1,4-dihydroquinoline electron donor moiety, as illustrated in Figure S25. This protonation event hindered the effective intramolecular charge transfer in the reduced form of the probe. Considering that we are detecting NAD(P)H levels in mitochondria, where the pH typically hovers around 8.0, any potential pH effect on the detected NAD(P)H levels within the mitochondria is expected to be minimal.

## 2.6. Cell culture and cell imaging.

### 2.6.1. Cell culture.

In all experimental procedures, A549 cells were treated with probe **A** at a concentration of 5  $\mu\text{M}$  for a duration of 30 minutes. For the NADH-dependent study, A549 cells were initially incubated with various concentrations of NADH (5, 20, 50  $\mu\text{M}$ ) in DMEM medium for 30 minutes. Subsequently, the cells were further exposed to 5  $\mu\text{M}$  of probe **A** for an additional 30 minutes. In the glucose-dependent study, A549 cells were pretreated with serum-free DMEM medium containing glucose concentrations of 0, 5, 10, and 20 mM for 30 minutes prior to the introduction of 5  $\mu\text{M}$  of probe **A** for 30 minutes. As for the pyruvate/lactate-dependent studies, A549 cells were pre-treated with 10 mM lactate, 5 mM pyruvate, or a combination of 10 mM lactate and 5 mM pyruvate in serum-free DMEM medium for 30 minutes before being exposed to 5  $\mu\text{M}$  of probe **A** in serum-free DMEM medium for an additional 30 minutes.

### 2.6.2. Assessing Cell Viability Using MTT Assay.

In this experiment, cells were seeded into individual wells of 96-well plates at a density of 5000 cells per well. Following an overnight incubation to allow for cell attachment and growth, fresh medium containing various concentrations of either probe **A** or probe **B** was added to each respective well. After 48 hours of treatment, 10  $\mu\text{L}$  of MTT solution (5 mg/mL in phosphate buffer solution) was introduced to

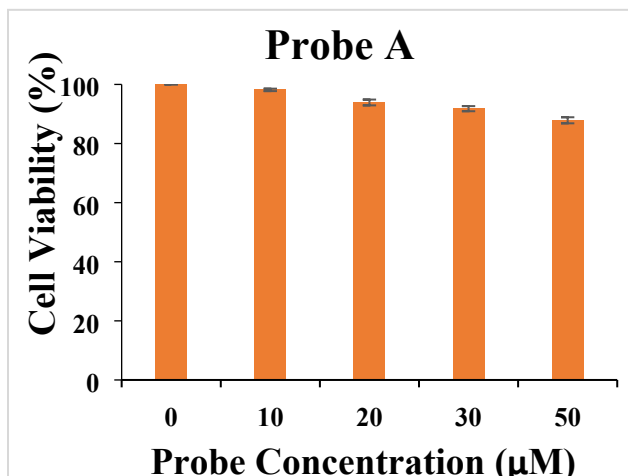

each well, followed by a 4-hour incubation at 37°C. Subsequently, 100 µL of DMSO was added to each well and incubated at 37°C for 15 minutes to dissolve the formazan crystals. The absorbance of each well was then measured at 590 nm using a plate reader. This experiment was conducted in triplicate to ensure reliable results.

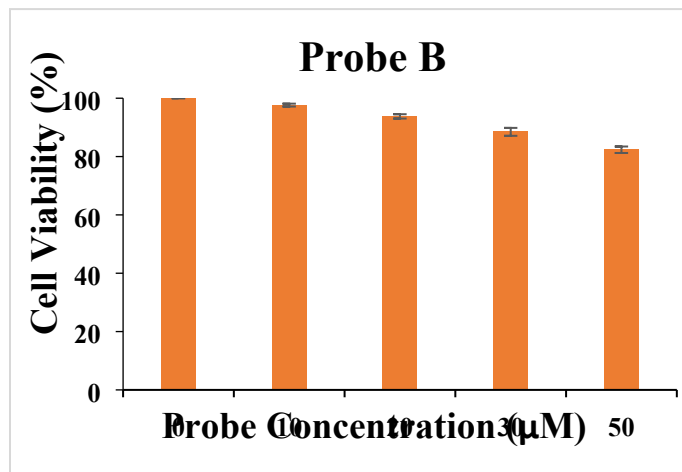

**Figure S25:** MTT assay for probe A(left) and probe B (right) with varying concentrations.

### 2.6.3. Drug treatment of A549 cells.

To assess the impact of cisplatin on NAD(P)H levels in A549 cells, the cells were exposed to various concentrations of cisplatin (5 µM, 10 µM, and 20 µM) in serum-free DMEM medium for a duration of two hours. Following this treatment, the cells were incubated with 5 µM of probe A in serum-free DMEM medium for thirty minutes to examine its effects.

To examine the influence of camptothecin on NAD(P)H levels in A549 cells, the cells were cultured in serum-free DMEM medium with different concentrations of gemcitabine (5 µM, 10 µM, and 20 µM) for a period of two hours. Subsequently, the cells were treated with 5 µM of probe A in serum-free DMEM medium for thirty minutes to investigate the impact.

In order to investigate the impact of gemcitabine on NAD(P)H levels in A549 cells, the cells were treated with various concentrations of gemcitabine (5 µM, 10 µM, and 20 µM) in DMEM medium without serum for a duration of two hours. Following this treatment, the cells were incubated with 5 µM of probe A in serum-free DMEM medium for thirty minutes to analyze its effects.

### 2.6.4. Colocalization Study.

To perform the colocalization analysis, A549 cells were initially exposed to 25 mM glucose for a duration of 30 minutes. Subsequently, the cells were incubated with 5 µM of probe A and a cyanine dye (IR-780) in serum-free DMEM medium for 30 minutes.

### 2.6.5. Hypoxia experiment.

In order to examine the NADH levels under hypoxic conditions, A549 cells were pre-treated with varying concentrations of  $\text{CoCl}_2$  (50, 100, and 150  $\mu\text{M}$ ) for a period of 12 hours. Following this pre-treatment, the cells were incubated with 5  $\mu\text{M}$  of probe **A** in serum-free DMEM medium for 30 minutes.

### 2.6.6. Cell culture conditions and cellular imaging for fibroblast cells.

Fibroblast cells were exposed to probe **A** at a concentration of 5  $\mu\text{M}$  for a duration of 30 minutes. In the glucose-dependent study, fibroblast cells were initially treated with serum-free DMEM medium containing different glucose concentrations (0, 5, 10, and 20 mM) for 30 minutes before being exposed to 5  $\mu\text{M}$  of probe **A** for an additional 30 minutes.

For the time-dependent study, fibroblast cells were pre-treated with 15  $\mu\text{M}$  NADH in glucose-free DMEM medium for 30 minutes. Subsequently, they were incubated with 5  $\mu\text{M}$  of probe **A** in glucose-free DMEM medium for various incubation times. Fluorescence signals from both sets of images were captured between 700 nm and 780 nm upon excitation at 633 nm.

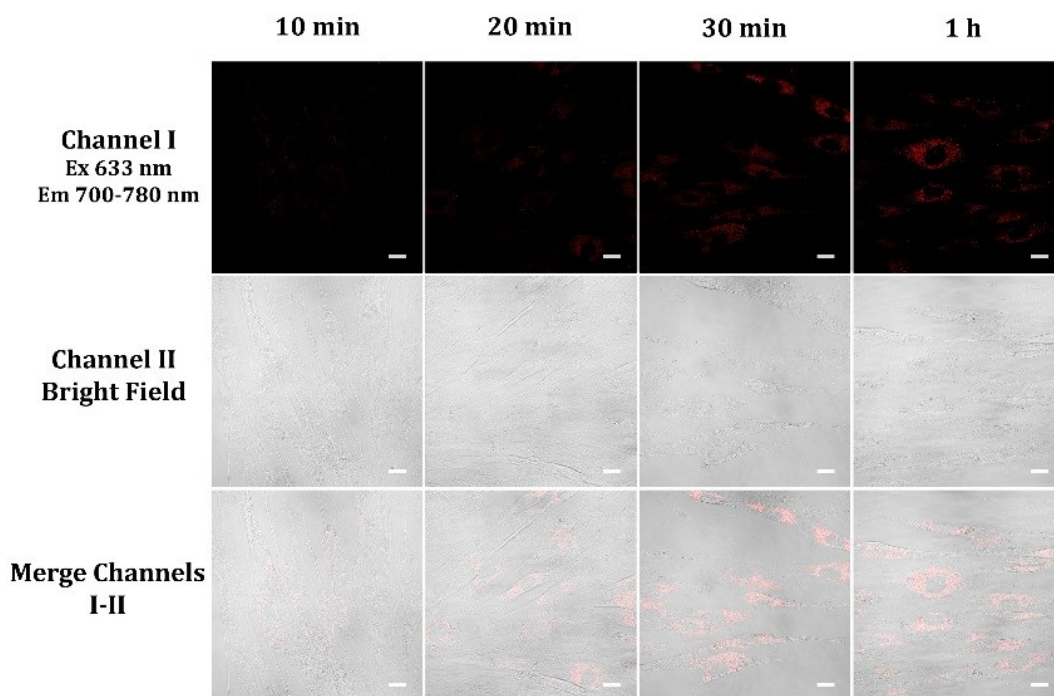

**Figure S26:** Cellular Fluorescence images of Fibroblast cells incubated with 20  $\mu\text{M}$  NADH in glucose-free DMEM medium for 30 minutes and incubated with 5  $\mu\text{M}$  probe **A** in glucose-free DMEM medium for varying incubation times. Image fluorescence signals were captured between 700 nm to 780 nm upon 633 nm excitation for both sets of images.

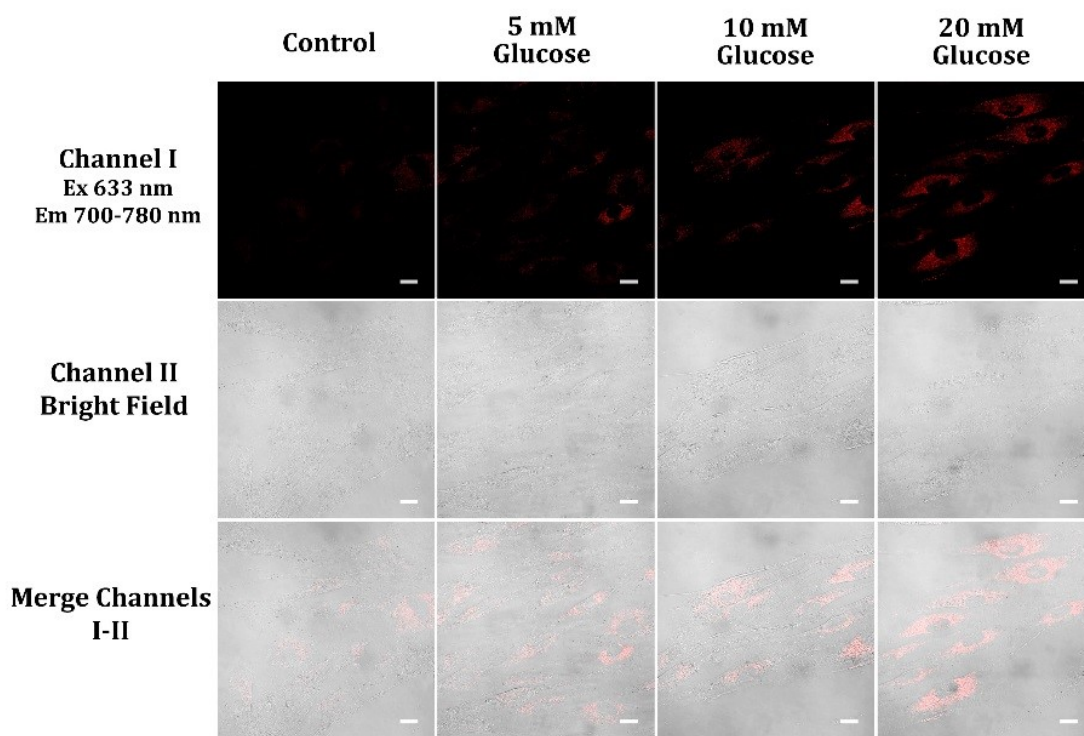

**Figure S27:** Cellular fluorescence images of Fibroblast cells cultivated in DMEM medium containing 0, 5, 10, and 20 mM glucose for 30 min and subsequently treated with 5  $\mu$ M of probe **A** in glucose-deficient DMEM medium for 30 minutes. Image fluorescence signals were captured between 700 nm to 780 nm upon 633 nm excitation for both sets of images.

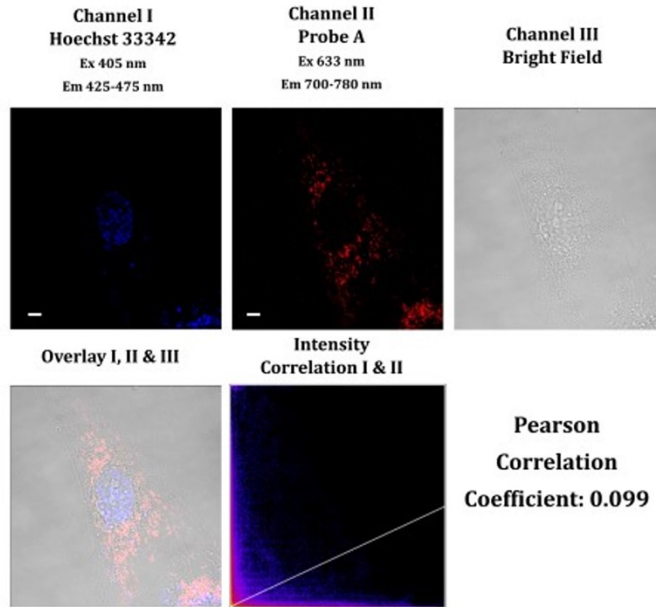

**Figure S28:** Cellular fluorescence images of Fibroblast cells following a 30-minute pre-treatment with 10 mM glucose in cell medium. Subsequently, the cells were co-incubated with 5  $\mu$ M of the nucleus-specific stain Hoechst 33342, 5  $\mu$ M of the lysosome-specific marker LysoSensor Green, and 5  $\mu$ M of Probe A in the same cell medium for an additional 30 minutes. Fluorescence imaging was conducted within specific wavelength ranges: Hoechst 33342 images were acquired between 425 nm and 475 nm under excitation at 405 nm, LysoSensor Green images were captured between 500 nm and 550 nm under excitation at 488 nm, and probe A images were recorded in the range of 700 nm to 780 nm under excitation at 633 nm.

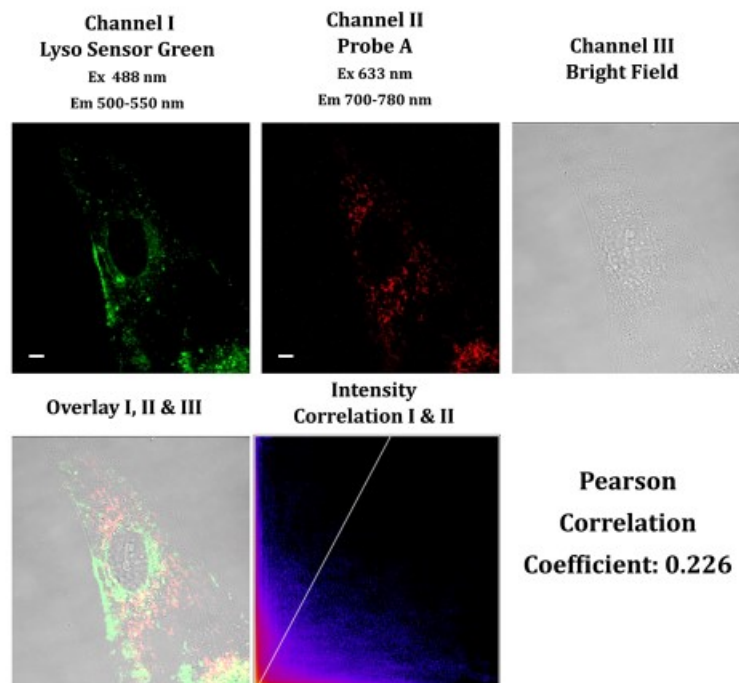

**Figure S29:** Fluorescence imaging of Fibroblast cells treated with glucose and stained with multiple dyes. Cells were pretreated for 30 minutes with medium containing 10 mM glucose. They were then coincubated for 30 additional minutes with 5  $\mu$ M Hoechst 33342 to stain nuclei, 5  $\mu$ M LysoSensor Green to label lysosomes, and 5  $\mu$ M probe **A**. The cells were imaged using fluorescence microscopy with the following settings: Hoechst 33342 excitation 405 nm, emission 425-475 nm; LysoSensor Green excitation 488 nm, emission 500-550 nm; probe **A** excitation 633 nm, emission 700-780 nm. This allowed visualization of the nucleus (blue), lysosomes (green), and probe **A** signal (red).

#### 2.7. *D. melanogaster* larval imaging

The study utilized the Canton-S strain of wild-type *Drosophila melanogaster* flies. Female flies were allowed to deposit their eggs on agar plates containing a mixture of sucrose and Baker's yeast. After an incubation period of 8 hours, the eggs were carefully collected, and the yeast was removed to facilitate the hatching of larvae. The hatched larvae were gently collected using a pin and rinsed twice with 1 mL of PBS.

To collect the eggs, young adult *Drosophila melanogaster* flies were placed in plastic egg-lay chambers containing sugar agar plates supplemented with live Baker's yeast. The chambers were maintained at room temperature under a 12:12-hour light/dark cycle. Eggs were collected in the early morning and late afternoon using a moist brush, followed by a 1-minute rinse with tap water in a filter basket. Subsequently, the eggs were transferred to small Petri dishes placed on moist paper towel layers. The small dishes were then placed inside larger dishes with water at the bottom to prevent desiccation. The eggs were incubated at 18°C until the larvae hatched, which typically occurred after 2 days. Upon hatching, the newly emerged larvae were delicately transferred with a fine brush to glass viewing dishes and immediately used for the staining experiments. Any larvae that perished during the experiment due to starvation were eliminated during the washing steps.

Freshly hatched starved fruit fly larvae were exposed to various concentrations of NADH, ranging from 0 (control) to 50  $\mu$ M, in a pH 7.4 PBS buffer for 1 hour. Following the exposure, they underwent three washes with the PBS buffer before being immersed in a PBS buffer solution containing 10  $\mu$ M of probe **A** for 2 hours. Fluorescence signals from the resulting images were captured within a wavelength range of 700-780 nm upon excitation at 633 nm.

Freshly hatched starved fruit fly larvae were exposed to different concentrations of cisplatin, ranging from 0 (control) to 20  $\mu$ M, in a pH 7.4 PBS buffer for 2 hours. Subsequently, they were washed three times with the PBS buffer and immersed in a PBS buffer solution containing 10  $\mu$ M of probe **A** for 2 hours. Fluorescence signals from the resulting images were acquired within a wavelength range of 700-780 nm upon excitation at 633 nm.

### 3. Theoretical calculations

Models of probes **A**, **AH**, **B**, and **BH** were generated through the use of Gaussian 16<sup>21</sup> and density functional theory (DFT), using the APFD functional and electron basis sets at the 6-311+g(d) for optimization of the geometry in a Polarizable Continuum Model (PCM) of water. Upon confirming the lack of imaginary frequencies, the CAM-B3LYP/6-311+g(d) basis set was also used in a TD-DFT calculation to calculate the absorption energies. Results were interpreted using GaussView 6<sup>22</sup> for all data and figures.

**Table S2:** Calculated atomic coordinates for probe **A(cis)** in water.

| Row | Symbol | X        | Y        | Z        | Row | Symbol | X        | Y        | Z        |
|-----|--------|----------|----------|----------|-----|--------|----------|----------|----------|
| 1   | C      | -9.26072 | -0.11565 | -1.27285 | 28  | C      | 8.91157  | 0.470575 | -0.19302 |
| 2   | C      | -9.4422  | 0.954693 | -0.37299 | 29  | C      | 9.13926  | 1.74933  | -0.64489 |
| 3   | C      | -8.39816 | 1.44582  | 0.378264 | 30  | C      | 8.0567   | 2.609754 | -0.92061 |
| 4   | C      | -7.12642 | 0.864673 | 0.244155 | 31  | C      | 6.761954 | 2.182163 | -0.7417  |
| 5   | C      | -6.9269  | -0.21802 | -0.65634 | 32  | C      | -6.20377 | 2.430148 | 1.907299 |
| 6   | C      | -8.02471 | -0.69133 | -1.41386 | 33  | H      | -10.103  | -0.47923 | -1.85177 |
| 7   | N      | -6.04049 | 1.314688 | 0.967165 | 34  | H      | -10.4242 | 1.404428 | -0.26821 |
| 8   | C      | -4.84261 | 0.757628 | 0.843235 | 35  | H      | -8.57053 | 2.269704 | 1.058497 |
| 9   | C      | -4.58761 | -0.30769 | -0.03149 | 36  | H      | -7.86577 | -1.51565 | -2.10152 |
| 10  | C      | -5.64835 | -0.78105 | -0.7832  | 37  | H      | -4.06566 | 1.17055  | 1.473448 |
| 11  | C      | -3.25786 | -0.89785 | -0.1211  | 38  | H      | -5.49802 | -1.58717 | -1.49392 |
| 12  | C      | -2.95798 | -2.21126 | -0.40782 | 39  | H      | -3.71278 | -2.97046 | -0.57432 |
| 13  | C      | -1.57722 | -2.4664  | -0.41564 | 40  | H      | -1.1403  | -3.43995 | -0.60652 |
| 14  | C      | -0.8102  | -1.35091 | -0.13579 | 41  | H      | 1.076251 | -2.30002 | -0.26385 |
| 15  | S      | -1.82322 | 0.037191 | 0.130957 | 42  | H      | 0.938338 | 0.736297 | 0.244405 |
| 16  | C      | 0.617831 | -1.33465 | -0.07031 | 43  | H      | 5.913969 | -2.816   | 1.003916 |
| 17  | C      | 1.393858 | -0.24662 | 0.156169 | 44  | H      | 8.193764 | -1.97358 | 0.659042 |
| 18  | C      | 2.823449 | -0.24914 | 0.184097 | 45  | H      | 3.930114 | -2.69858 | 2.005883 |
| 19  | N      | 3.648435 | -1.23178 | 0.560834 | 46  | H      | 2.243217 | -2.31325 | 1.660846 |
| 20  | C      | 4.995923 | -0.9332  | 0.399062 | 47  | H      | 3.187363 | -3.28668 | 0.497461 |
| 21  | C      | 5.20325  | 0.355112 | -0.06587 | 48  | H      | 9.743682 | -0.1945  | 0.020077 |
| 22  | S      | 3.683785 | 1.146707 | -0.32963 | 49  | H      | 10.15584 | 2.101315 | -0.79135 |
| 23  | C      | 6.078206 | -1.79921 | 0.667584 | 50  | H      | 8.247294 | 3.617445 | -1.27688 |
| 24  | C      | 7.344681 | -1.32481 | 0.466755 | 51  | H      | 5.934848 | 2.853379 | -0.95667 |
| 25  | C      | 7.594326 | -0.00198 | 0.003481 | 52  | H      | -6.93063 | 2.159359 | 2.671279 |
| 26  | C      | 6.505614 | 0.874278 | -0.27825 | 53  | H      | -5.24632 | 2.633043 | 2.376978 |
| 27  | C      | 3.221821 | -2.46581 | 1.213951 | 54  | H      | -6.53467 | 3.315227 | 1.365957 |

**Table S3:** Calculated atomic coordinates for probe **A(trans)** in water.

| Row | Symbol | X        | Y        | Z        | Row | Symbol | X        | Y        | Z        |
|-----|--------|----------|----------|----------|-----|--------|----------|----------|----------|
| 1   | C      | -6.79039 | 2.996061 | -2.8E-05 | 11  | C      | -2.19422 | -1.13485 | -1.1E-05 |
| 2   | C      | -7.83078 | 2.044715 | 0.000001 | 12  | C      | -1.79735 | -2.45799 | -8E-06   |
| 3   | C      | -7.56675 | 0.692949 | 0.00002  | 13  | C      | -0.40462 | -2.61379 | -0.00001 |
| 4   | C      | -6.23202 | 0.258006 | 0.00001  | 14  | C      | 0.282304 | -1.41242 | -1.3E-05 |
| 5   | C      | -5.17095 | 1.203345 | -1.8E-05 | 15  | S      | -0.82682 | -0.07417 | -1.6E-05 |
| 6   | C      | -5.48282 | 2.583854 | -3.8E-05 | 16  | C      | 1.699457 | -1.27648 | -1.2E-05 |
| 7   | N      | -5.90089 | -1.08265 | 0.000028 | 17  | C      | 2.396383 | -0.11067 | -1.1E-05 |
| 8   | C      | -4.63966 | -1.48965 | 0.000019 | 18  | C      | 3.818484 | -0.0476  | -7E-06   |
| 9   | C      | -3.55002 | -0.6037  | -7E-06   | 19  | N      | 4.506233 | 1.100598 | 0.000013 |
| 10  | C      | -3.84436 | 0.749345 | -2.6E-05 | 20  | C      | 5.889423 | 0.943501 | 0.000013 |



| Row | Symbol | X        | Y        | Z        | Row | Symbol | X        | Y        | Z        |
|-----|--------|----------|----------|----------|-----|--------|----------|----------|----------|
| 21  | C      | 6.262481 | -0.40595 | -7E-06   | 35  | H      | -2.4807  | -3.29778 | -5E-06   |
| 22  | S      | 4.853214 | -1.42722 | -2.8E-05 | 36  | H      | 0.098069 | -3.5742  | -8E-06   |
| 23  | C      | 6.861712 | 1.944266 | 0.000031 | 37  | H      | 2.233123 | -2.22542 | -9E-06   |
| 24  | C      | 8.192713 | 1.559373 | 0.000028 | 38  | H      | 1.866117 | 0.835727 | -1.2E-05 |
| 25  | C      | 8.561593 | 0.20768  | 0.000008 | 39  | H      | 6.601094 | 2.995537 | 0.000046 |
| 26  | C      | 7.600975 | -0.79176 | -0.00001 | 40  | H      | 8.962006 | 2.324469 | 0.000042 |
| 27  | C      | 3.848993 | 2.405066 | 0.000037 | 41  | H      | 9.612337 | -0.06304 | 0.000007 |
| 28  | C      | -6.96713 | -2.0922  | 0.000058 | 42  | H      | 7.87878  | -1.83988 | -2.6E-05 |
| 29  | H      | -7.0303  | 4.054011 | -4.3E-05 | 43  | H      | 3.237602 | 2.51264  | 0.895102 |
| 30  | H      | -8.86264 | 2.380456 | 0.000008 | 44  | H      | 4.603583 | 3.183322 | 0.00006  |
| 31  | H      | -8.3878  | -0.01198 | 0.000042 | 45  | H      | 3.237615 | 2.512681 | -0.89503 |
| 32  | H      | -4.66909 | 3.301974 | -0.00006 | 46  | H      | -7.57752 | -1.97493 | -0.89385 |
| 33  | H      | -4.49914 | -2.56101 | 0.000034 | 47  | H      | -6.51469 | -3.07896 | 0.000076 |
| 34  | H      | -3.05147 | 1.4913   | -4.8E-05 | 48  | H      | -7.57751 | -1.97489 | 0.893973 |

**Table S4:** Calculated atomic coordinates for probe AH(*cis*) in water.

| Row | Symbol | X        | Y        | Z        | Row | Symbol | X        | Y        | Z        |
|-----|--------|----------|----------|----------|-----|--------|----------|----------|----------|
| 1   | C      | 7.414916 | 3.435199 | 0.000469 | 16  | C      | -0.57403 | -1.7978  | 0.000094 |
| 2   | C      | 8.53334  | 2.60829  | 0.000155 | 17  | C      | -1.38057 | -0.67837 | 0.000223 |
| 3   | C      | 8.382084 | 1.226942 | -0.00013 | 18  | C      | -2.78163 | -0.57249 | 0.000206 |
| 4   | C      | 7.103837 | 0.656064 | -0.00011 | 19  | N      | -3.74604 | -1.51794 | 0.00031  |
| 5   | C      | 5.968866 | 1.482556 | 0.000204 | 20  | C      | -5.04476 | -1.01398 | 0.00017  |
| 6   | C      | 6.147061 | 2.862178 | 0.00049  | 21  | C      | -5.08393 | 0.369757 | 0.000016 |
| 7   | N      | 6.944073 | -0.73999 | -0.00041 | 22  | S      | -3.47241 | 1.01981  | 0.000017 |
| 8   | C      | 5.712013 | -1.28931 | -0.00036 | 23  | C      | -6.2412  | -1.76448 | 0.000168 |
| 9   | C      | 4.541713 | -0.58291 | -0.00005 | 24  | C      | -7.43499 | -1.09474 | 0.000036 |
| 10  | C      | 4.570633 | 0.920841 | 0.000232 | 25  | C      | -7.50508 | 0.324353 | -0.00011 |
| 11  | C      | 3.294294 | -1.2654  | -3.2E-05 | 26  | C      | -6.30288 | 1.090995 | -0.00013 |
| 12  | C      | 3.006062 | -2.63977 | -0.00016 | 27  | C      | -3.45535 | -2.94238 | 0.00061  |
| 13  | C      | 1.651056 | -2.9191  | -0.00012 | 28  | C      | 8.110582 | -1.60535 | -0.00077 |
| 14  | C      | 0.827752 | -1.78712 | 0.000047 | 29  | H      | 4.024321 | 1.308702 | -0.87244 |
| 15  | S      | 1.818414 | -0.34299 | 0.000157 | 30  | H      | 4.024485 | 1.30837  | 0.873151 |

| Row | Symbol | X        | Y        | Z        | Row | Symbol | X        | Y        | Z        |
|-----|--------|----------|----------|----------|-----|--------|----------|----------|----------|
| 31  | C      | -8.74484 | 1.004482 | -0.00025 | 44  | H      | -6.23111 | -2.84733 | 0.000248 |
| 32  | C      | -8.79325 | 2.378388 | -0.0004  | 45  | H      | -8.36171 | -1.66069 | 0.000032 |
| 33  | C      | -7.59956 | 3.130944 | -0.00043 | 46  | H      | -4.38433 | -3.50113 | 0.001082 |
| 34  | C      | -6.37716 | 2.501823 | -0.0003  | 47  | H      | -2.89487 | -3.20891 | -0.89564 |
| 35  | H      | 7.526635 | 4.515178 | 0.000696 | 48  | H      | -2.89431 | -3.20838 | 0.896665 |
| 36  | H      | 9.532519 | 3.033563 | 0.000134 | 49  | H      | 7.781124 | -2.64171 | -0.00098 |
| 37  | H      | 9.267469 | 0.602568 | -0.00037 | 50  | H      | 8.719691 | -1.43486 | -0.89134 |
| 38  | H      | 5.265535 | 3.499004 | 0.000731 | 51  | H      | 8.719932 | -1.43529 | 0.88971  |
| 39  | H      | 5.70892  | -2.37183 | -0.00061 | 52  | H      | -9.66167 | 0.421259 | -0.00024 |
| 40  | H      | 3.768925 | -3.40851 | -0.00025 | 53  | H      | -9.75112 | 2.889772 | -0.00051 |
| 41  | H      | 1.240886 | -3.92363 | -0.0002  | 54  | H      | -7.64765 | 4.215756 | -0.00055 |
| 42  | H      | -0.99931 | -2.79376 | -2.8E-05 | 55  | H      | -5.46477 | 3.092178 | -0.00032 |
| 43  | H      | -0.88187 | 0.288281 | 0.000274 |     |        |          |          |          |

**Table S5:** Calculated atomic coordinates for probe **AH**(*trans* in water.

| Row | Symbol | X        | Y        | Z        | Row | Symbol | X        | Y        | Z        |
|-----|--------|----------|----------|----------|-----|--------|----------|----------|----------|
| 1   | C      | -6.81551 | 3.001712 | -3.8E-05 | 18  | C      | 3.806557 | -0.03762 | -4E-06   |
| 2   | C      | -7.83273 | 2.053101 | -1.7E-05 | 19  | N      | 4.50819  | 1.115829 | 0.000016 |
| 3   | C      | -7.52517 | 0.698031 | 0.000006 | 20  | C      | 5.890825 | 0.957184 | 0.000011 |
| 4   | C      | -6.19033 | 0.277118 | 0.00001  | 21  | C      | 6.268628 | -0.39052 | -8E-06   |
| 5   | C      | -5.15677 | 1.226783 | -0.00001 | 22  | S      | 4.858989 | -1.4225  | -2.6E-05 |
| 6   | C      | -5.49061 | 2.577239 | -3.5E-05 | 23  | C      | 6.862945 | 1.956479 | 0.000023 |
| 7   | N      | -5.87265 | -1.09297 | 0.000032 | 24  | C      | 8.198663 | 1.576414 | 0.000017 |
| 8   | C      | -4.58859 | -1.49909 | 0.000019 | 25  | C      | 8.570701 | 0.228727 | 0        |
| 9   | C      | -3.50454 | -0.6633  | -1E-06   | 26  | C      | 7.606316 | -0.77139 | -1.3E-05 |
| 10  | C      | -3.70419 | 0.827182 | -3E-06   | 27  | C      | 3.846251 | 2.411826 | 0.000051 |
| 11  | C      | -2.19086 | -1.20045 | -0.00001 | 28  | C      | -6.93487 | -2.08442 | 0.00006  |
| 12  | C      | -1.75194 | -2.53709 | -1.4E-05 | 29  | H      | -3.20566 | 1.274219 | 0.872826 |
| 13  | C      | -0.37704 | -2.66559 | -1.6E-05 | 30  | H      | -3.20565 | 1.274219 | -0.87283 |
| 14  | C      | 0.316677 | -1.447   | -1.4E-05 | 31  | H      | -7.04952 | 4.061926 | -5.7E-05 |
| 15  | S      | -0.82636 | -0.12042 | -1.1E-05 | 32  | H      | -8.87379 | 2.36189  | -1.9E-05 |
| 16  | C      | 1.703922 | -1.29453 | -1.1E-05 | 33  | H      | -8.33347 | -0.02322 | 0.00002  |
| 17  | C      | 2.407468 | -0.10671 | -8E-06   | 34  | H      | -4.68747 | 3.310412 | -5.1E-05 |

| Row | Symbol | X        | Y        | Z        | Row | Symbol | X        | Y        | Z        |
|-----|--------|----------|----------|----------|-----|--------|----------|----------|----------|
| 35  | H      | -4.46224 | -2.57422 | 0.000029 | 43  | H      | 7.885674 | -1.81953 | -2.8E-05 |
| 36  | H      | -2.42567 | -3.38485 | -1.7E-05 | 44  | H      | 3.229949 | 2.518037 | -0.89327 |
| 37  | H      | 0.14191  | -3.61849 | -1.8E-05 | 45  | H      | 3.229888 | 2.517954 | 0.893344 |
| 38  | H      | 2.255147 | -2.23444 | -8E-06   | 46  | H      | 4.593698 | 3.197789 | 0.000116 |
| 39  | H      | 1.864428 | 0.832584 | -1.1E-05 | 47  | H      | -6.49124 | -3.07723 | 0.000089 |
| 40  | H      | 6.599907 | 3.007535 | 0.000034 | 48  | H      | -7.55875 | -1.98271 | 0.890696 |
| 41  | H      | 8.964459 | 2.345425 | 0.000026 | 49  | H      | -7.55875 | -1.98276 | -0.89058 |
| 42  | H      | 9.621491 | -0.04242 | -4E-06   |     |        |          |          |          |

**Table S6:** Calculated atomic coordinates for probe **B** in water.

| Row | Symbol | X        | Y        | Z        | Row | Symbol | X        | Y        | Z        |
|-----|--------|----------|----------|----------|-----|--------|----------|----------|----------|
| 1   | C      | 8.594824 | -1.81256 | -0.16078 | 31  | O      | -2.19111 | 2.576183 | 0.199487 |
| 2   | C      | 8.796163 | -0.43322 | -0.02504 | 32  | H      | 9.449697 | -2.47756 | -0.22661 |
| 3   | C      | 7.728755 | 0.446951 | 0.061778 | 33  | H      | 9.806768 | -0.04025 | 0.013574 |
| 4   | C      | 6.437758 | -0.079   | 0.01027  | 34  | H      | 7.908822 | 1.509973 | 0.167131 |
| 5   | C      | 6.241281 | -1.4585  | -0.12433 | 35  | H      | 7.148646 | -3.40854 | -0.31682 |
| 6   | C      | 7.31395  | -2.34194 | -0.21196 | 36  | H      | 2.707698 | 1.424855 | 0.181054 |
| 7   | N      | 5.232653 | 0.614235 | 0.078242 | 37  | H      | 4.608824 | 2.486586 | -0.6323  |
| 8   | C      | 4.140117 | -0.1593  | 0.004898 | 38  | H      | 4.646343 | 2.321414 | 1.148152 |
| 9   | C      | 2.819332 | 0.355901 | 0.057713 | 39  | H      | 6.149003 | 2.480012 | 0.231626 |
| 10  | C      | 5.147747 | 2.064803 | 0.215393 | 40  | H      | 1.829098 | -1.50495 | -0.1651  |
| 11  | C      | 1.708111 | -0.42966 | -0.04273 | 41  | H      | -4.11727 | 1.880237 | -0.72407 |
| 12  | C      | 0.372964 | 0.036685 | -0.00578 | 42  | H      | -3.42992 | -2.16016 | 0.574638 |
| 13  | C      | -0.10684 | 1.336957 | 0.098442 | 43  | H      | -8.40303 | 0.072298 | -0.46236 |
| 14  | C      | -1.52198 | 1.410735 | 0.081902 | 44  | H      | -9.29943 | -2.11746 | 0.126307 |
| 15  | C      | -2.12898 | 0.175192 | -0.04392 | 45  | H      | -7.80204 | -3.98491 | 0.782759 |
| 16  | S      | -0.95091 | -1.08423 | -0.14924 | 46  | H      | -5.35017 | -3.63842 | 0.8481   |
| 17  | C      | -3.55143 | -0.11037 | -0.06404 | 47  | H      | -6.00841 | 2.675546 | -1.1069  |
| 18  | C      | -4.45828 | 0.895193 | -0.44118 | 48  | H      | -7.19845 | 1.536679 | -1.76649 |
| 19  | N      | -5.7696  | 0.700341 | -0.47555 | 49  | H      | -7.30813 | 2.068093 | -0.06316 |
| 20  | C      | -6.33448 | -0.51624 | -0.14997 | 50  | H      | 0.617259 | 4.431153 | 0.435249 |
| 21  | C      | -5.46319 | -1.57533 | 0.225158 | 51  | H      | -0.14495 | 3.816745 | -1.05352 |
| 22  | C      | -4.08018 | -1.3471  | 0.265675 | 52  | H      | -1.90789 | 4.555197 | 0.550054 |
| 23  | C      | -7.72348 | -0.7221  | -0.18221 | 53  | H      | -1.24186 | 3.472714 | 1.798842 |
| 24  | C      | -8.22615 | -1.9598  | 0.151625 | 54  | S      | 4.540554 | -1.83239 | -0.15648 |
| 25  | C      | -7.37619 | -3.02105 | 0.524878 |     |        |          |          |          |
| 26  | C      | -6.01885 | -2.83294 | 0.562085 |     |        |          |          |          |
| 27  | C      | -6.63271 | 1.816964 | -0.87951 |     |        |          |          |          |
| 28  | O      | 0.681183 | 2.414106 | 0.212843 |     |        |          |          |          |
| 29  | C      | -0.02432 | 3.655176 | 0.021115 |     |        |          |          |          |
| 30  | C      | -1.36343 | 3.628271 | 0.722832 |     |        |          |          |          |

**Table S7:** Calculated atomic coordinates for probe **BH** in water.

| Row | Symbol | X        | Y        | Z        | Row | Symbol | X        | Y        | Z        |
|-----|--------|----------|----------|----------|-----|--------|----------|----------|----------|
| 1   | C      | 8.555546 | -1.94628 | 0.000854 | 29  | C      | 0.026333 | 3.738331 | -0.30329 |
| 2   | C      | 8.801951 | -0.57051 | 0.011236 | 30  | C      | -1.2987  | 3.78824  | 0.427172 |
| 3   | C      | 7.760877 | 0.349354 | 0.014716 | 31  | O      | -2.14864 | 2.714107 | 0.009072 |
| 4   | C      | 6.452198 | -0.13078 | 0.007439 | 32  | H      | 9.385719 | -2.64523 | -0.00155 |
| 5   | C      | 6.211212 | -1.50972 | -0.00272 | 33  | H      | 9.82471  | -0.20736 | 0.016943 |
| 6   | C      | 7.25283  | -2.43067 | -0.00619 | 34  | H      | 7.977076 | 1.411068 | 0.023394 |
| 7   | N      | 5.274744 | 0.609709 | 0.008818 | 35  | H      | 7.050647 | -3.49644 | -0.014   |
| 8   | C      | 4.139785 | -0.12681 | 0.002415 | 36  | H      | 2.7663   | 1.499214 | 0.021395 |
| 9   | C      | 2.854856 | 0.421124 | 0.006283 | 37  | H      | 4.712777 | 2.428397 | -0.86905 |
| 10  | C      | 5.235469 | 2.063428 | 0.015898 | 38  | H      | 4.734288 | 2.421394 | 0.916166 |
| 11  | C      | 1.703536 | -0.35113 | -0.00854 | 39  | H      | 6.24821  | 2.452    | 0.004518 |
| 12  | C      | 0.396106 | 0.120419 | -0.0073  | 40  | H      | 1.812084 | -1.4355  | -0.02229 |
| 13  | C      | -0.09225 | 1.440671 | -0.01395 | 41  | H      | -4.17866 | 1.996212 | -0.07343 |
| 14  | C      | -1.485   | 1.529097 | -0.01127 | 42  | H      | -3.50805 | -1.97313 | 0.899567 |
| 15  | C      | -2.13504 | 0.28508  | -0.02073 | 43  | H      | -8.38982 | 0.035909 | -0.03393 |
| 16  | S      | -0.95709 | -0.99175 | -0.02259 | 44  | H      | -9.27124 | -2.24489 | 0.022358 |
| 17  | C      | -3.51749 | -0.03166 | -0.01734 | 45  | H      | -7.71372 | -4.19165 | 0.076128 |
| 18  | C      | -4.46752 | 0.955314 | -0.04681 | 46  | H      | -5.26744 | -3.79084 | 0.071355 |
| 19  | N      | -5.79882 | 0.734922 | -0.0456  | 47  | H      | -6.11799 | 2.78661  | -0.10123 |
| 20  | C      | -6.3129  | -0.57161 | -0.01354 | 48  | H      | -7.33453 | 1.839103 | -0.96955 |
| 21  | C      | -5.42906 | -1.66184 | 0.016156 | 49  | H      | -7.33858 | 1.88694  | 0.81076  |
| 22  | C      | -3.93393 | -1.47779 | 0.014581 | 50  | H      | 0.685699 | 4.540835 | 0.024394 |
| 23  | C      | -7.69501 | -0.79504 | -0.01105 | 51  | H      | -0.12149 | 3.807605 | -1.3849  |
| 24  | C      | -8.1963  | -2.0907  | 0.020832 | 52  | H      | -1.8317  | 4.709717 | 0.19638  |
| 25  | C      | -7.3281  | -3.17701 | 0.050779 | 53  | H      | -1.14812 | 3.71752  | 1.509343 |
| 26  | C      | -5.95557 | -2.94904 | 0.048002 | 54  | S      | 4.493629 | -1.8332  | -0.00874 |
| 27  | C      | -6.70367 | 1.870563 | -0.0782  | 55  | H      | -3.50555 | -2.01272 | -0.84628 |
| 28  | O      | 0.720152 | 2.511642 | -0.02037 |     |        |          |          |          |

**Table S8:** Calculated atomic coordinates for probe **C** in water.

| Row | Symbol | X        | Y        | Z        | Row | Symbol | X        | Y        | Z        |
|-----|--------|----------|----------|----------|-----|--------|----------|----------|----------|
| 1   | C      | -7.66048 | 0.228722 | 0.092092 | 28  | C      | 6.556277 | 2.934455 | -1.01646 |
| 2   | C      | -7.67543 | -1.18124 | -0.09971 | 29  | H      | 5.392181 | -1.9309  | 0.76935  |
| 3   | C      | -6.52645 | -1.9133  | -0.21049 | 30  | H      | -8.63559 | -1.68337 | -0.15926 |
| 4   | C      | -5.29074 | -1.23382 | -0.12995 | 31  | H      | -6.57297 | -2.98477 | -0.3564  |
| 5   | C      | -5.24454 | 0.138506 | 0.057785 | 32  | H      | -1.42066 | -2.32763 | -0.29149 |
| 6   | C      | -6.41886 | 0.923219 | 0.175765 | 33  | H      | -3.23828 | -3.37791 | -1.35091 |
| 7   | N      | -4.02331 | -1.79448 | -0.22094 | 34  | H      | -3.2333  | -3.62827 | 0.423183 |
| 8   | C      | -3.01912 | -0.91433 | -0.11186 | 35  | H      | -4.7421  | -3.73357 | -0.49185 |
| 9   | S      | -3.60027 | 0.690344 | 0.12002  | 36  | H      | -0.87135 | 0.684169 | 0.015512 |
| 10  | C      | -1.64324 | -1.27385 | -0.17541 | 37  | H      | 4.284366 | 1.845396 | -0.95556 |
| 11  | C      | -3.78794 | -3.2233  | -0.42296 | 38  | H      | 8.887335 | 2.226515 | -0.37668 |
| 12  | C      | -0.63202 | -0.37164 | -0.09582 | 39  | H      | 10.63108 | 0.745622 | 0.468355 |
| 13  | C      | 0.756561 | -0.69852 | -0.14571 | 40  | H      | 10.09602 | -1.53516 | 1.284002 |
| 14  | C      | 1.379816 | -1.92779 | -0.28709 | 41  | H      | 7.752811 | -2.34231 | 1.248023 |
| 15  | C      | 2.776777 | -1.83972 | -0.28626 | 42  | H      | 5.628621 | 3.388906 | -1.35182 |
| 16  | C      | 3.240533 | -0.54525 | -0.14488 | 43  | H      | 6.980622 | 3.528706 | -0.20796 |
| 17  | S      | 1.933577 | 0.568773 | -0.00375 | 44  | H      | 7.253819 | 2.873903 | -1.85093 |
| 18  | C      | 4.633057 | -0.11898 | -0.09493 | 45  | C      | -8.82911 | 2.330704 | 0.388047 |
| 19  | C      | 5.009979 | 1.152595 | -0.54952 | 46  | C      | -7.59628 | 3.010462 | 0.470035 |
| 20  | N      | 6.265228 | 1.581507 | -0.5236  | 47  | C      | -6.41089 | 2.321677 | 0.366226 |
| 21  | C      | 7.292136 | 0.787763 | -0.05533 | 48  | C      | -8.85922 | 0.968464 | 0.203086 |
| 22  | C      | 6.969024 | -0.51747 | 0.407864 | 49  | H      | -9.75594 | 2.888733 | 0.471719 |
| 23  | C      | 5.63333  | -0.94513 | 0.386087 | 50  | H      | -7.58395 | 4.085595 | 0.616041 |
| 24  | C      | 8.622821 | 1.236846 | -0.02922 | 51  | H      | -5.46651 | 2.853826 | 0.430425 |
| 25  | C      | 9.603848 | 0.397982 | 0.449053 | 52  | H      | -9.80596 | 0.44077  | 0.13946  |
| 26  | C      | 9.300613 | -0.89855 | 0.91294  | 53  | H      | 0.84135  | -2.86044 | -0.39919 |
| 27  | C      | 8.00623  | -1.34855 | 0.894815 | 54  | H      | 3.431951 | -2.69273 | -0.41187 |

**Table S9:** Calculated atomic coordinates for probe **CH** in water.

| Row | Symbol | X        | Y        | Z        | Row | Symbol | X        | Y        | Z        |
|-----|--------|----------|----------|----------|-----|--------|----------|----------|----------|
| 1   | C      | -7.71272 | 0.198587 | 0.002581 | 29  | H      | 5.502539 | -1.79266 | 0.870509 |
| 2   | C      | -7.71692 | -1.22264 | -0.01032 | 30  | H      | 5.520464 | -1.7918  | -0.87829 |
| 3   | C      | -6.5593  | -1.95268 | -0.01551 | 31  | H      | -8.67243 | -1.7373  | -0.01624 |
| 4   | C      | -5.32798 | -1.26188 | -0.00772 | 32  | H      | -6.59724 | -3.03459 | -0.02541 |
| 5   | C      | -5.2942  | 0.121619 | 0.004792 | 33  | H      | -1.4476  | -2.3355  | -0.00945 |
| 6   | C      | -6.47343 | 0.904529 | 0.010457 | 34  | H      | -3.25152 | -3.53216 | -0.92275 |
| 7   | N      | -4.05767 | -1.82456 | -0.01129 | 35  | H      | -3.25084 | -3.54947 | 0.866246 |
| 8   | C      | -3.04767 | -0.93082 | -0.00255 | 36  | H      | -4.75657 | -3.78836 | -0.02989 |
| 9   | S      | -3.64972 | 0.695776 | 0.012726 | 37  | H      | -0.9344  | 0.70476  | -0.00184 |
| 10  | C      | -1.68573 | -1.27874 | -0.00506 | 38  | H      | 4.212484 | 2.038608 | -0.04441 |
| 11  | C      | -3.80875 | -3.26088 | -0.02531 | 39  | H      | 8.841581 | 2.315704 | -0.00638 |
| 12  | C      | -0.66995 | -0.3518  | -0.00354 | 40  | H      | 10.70298 | 0.727901 | 0.044902 |
| 13  | C      | 0.704295 | -0.64339 | -0.00472 | 41  | H      | 10.25769 | -1.72486 | 0.078189 |
| 14  | C      | 1.361501 | -1.87357 | -0.00515 | 42  | H      | 7.915815 | -2.53443 | 0.057423 |
| 15  | C      | 2.745304 | -1.76904 | -0.00675 | 43  | H      | 5.535069 | 3.655812 | -0.07824 |
| 16  | C      | 3.219506 | -0.44894 | -0.00888 | 44  | H      | 7.036732 | 3.442358 | 0.836631 |
| 17  | S      | 1.877141 | 0.657889 | -0.00538 | 45  | H      | 7.059475 | 3.408325 | -0.94501 |
| 18  | C      | 4.590803 | -0.06081 | -0.01247 | 46  | C      | -8.89492 | 2.315229 | 0.020397 |
| 19  | C      | 4.959052 | 1.252392 | -0.03016 | 47  | C      | -7.66489 | 3.006782 | 0.028119 |
| 20  | N      | 6.234159 | 1.700679 | -0.03232 | 48  | C      | -6.47581 | 2.317336 | 0.023248 |
| 21  | C      | 7.305402 | 0.794053 | -0.0046  | 49  | C      | -8.9162  | 0.940878 | 0.007909 |
| 22  | C      | 7.044659 | -0.58614 | 0.013141 | 50  | H      | -9.82503 | 2.874207 | 0.024391 |
| 23  | C      | 5.641437 | -1.13988 | -0.00204 | 51  | H      | -7.65885 | 4.091956 | 0.037936 |
| 24  | C      | 8.627509 | 1.254296 | 0.006998 | 52  | H      | -5.53439 | 2.859065 | 0.029282 |
| 25  | C      | 9.68462  | 0.352722 | 0.036373 | 53  | H      | -9.85996 | 0.403754 | 0.00196  |
| 26  | C      | 9.436952 | -1.01548 | 0.054944 | 54  | H      | 0.835568 | -2.82091 | -0.00461 |
| 27  | C      | 8.120706 | -1.46714 | 0.043385 | 55  | H      | 3.407758 | -2.62485 | -0.00805 |
| 28  | C      | 6.487793 | 3.130898 | -0.05576 |     |        |          |          |          |

**Table S10:** Calculated atomic coordinates for probe D in water.

| Row | Symbol | X        | Y        | Z        |    |   |          |          |          |
|-----|--------|----------|----------|----------|----|---|----------|----------|----------|
|     |        |          |          |          | 26 | C | -6.30381 | -2.69609 | 0.392705 |
| 1   | C      | -3.32914 | -0.75179 | 0.067849 | 27 | C | -8.27112 | -1.31543 | 0.253257 |
| 2   | C      | -1.95984 | -1.19289 | 0.100529 | 28 | C | -7.67944 | -2.57407 | 0.407818 |
| 3   | C      | -0.89016 | -0.37157 | 0.031337 | 29 | C | -5.16743 | 0.846443 | -0.11259 |
| 4   | C      | 0.477264 | -0.80766 | 0.05754  | 30 | C | -4.53478 | 3.178475 | -0.44967 |
| 5   | C      | 1.008358 | -2.08089 | 0.148622 | 31 | N | -3.72058 | 3.993747 | -0.57987 |
| 6   | C      | 2.411466 | -2.09637 | 0.138379 | 32 | C | -6.84428 | 2.716786 | -0.33866 |
| 7   | C      | 2.969104 | -0.8373  | 0.040894 | 33 | N | -7.88779 | 3.221644 | -0.38819 |
| 8   | S      | 1.743594 | 0.373266 | -0.04703 | 34 | H | -1.83178 | -2.26691 | 0.193643 |
| 9   | C      | 4.381844 | -0.48771 | 0.009545 | 35 | H | -1.04712 | 0.701135 | -0.04828 |
| 10  | C      | 5.300264 | -1.40752 | -0.5185  | 36 | H | 0.402888 | -2.97489 | 0.229206 |
| 11  | N      | 6.604447 | -1.17198 | -0.57102 | 37 | H | 2.998081 | -3.00238 | 0.230636 |
| 12  | C      | 7.145864 | 0.014368 | -0.11862 | 38 | H | 9.214782 | -0.46253 | -0.57855 |
| 13  | C      | 6.259488 | 0.991544 | 0.411202 | 39 | H | 10.07182 | 1.668068 | 0.24387  |
| 14  | C      | 4.884714 | 0.715995 | 0.469832 | 40 | H | 8.549251 | 3.389589 | 1.17824  |
| 15  | C      | 8.526299 | 0.268643 | -0.17629 | 41 | H | 6.111657 | 2.957299 | 1.285197 |
| 16  | C      | 9.005923 | 1.472356 | 0.288381 | 42 | H | 6.872436 | -3.05139 | -1.43818 |
| 17  | C      | 8.141193 | 2.451288 | 0.819253 | 43 | H | 7.993541 | -1.79835 | -2.01522 |
| 18  | C      | 6.792185 | 2.215948 | 0.880327 | 44 | H | 8.203744 | -2.51865 | -0.39117 |
| 19  | C      | 7.481581 | -2.20212 | -1.14269 | 45 | H | -7.9732  | 0.765838 | -0.03273 |
| 20  | C      | -7.4868  | -0.19135 | 0.084221 | 46 | H | -5.81057 | -3.6544  | 0.510035 |
| 21  | C      | -3.78831 | 0.523933 | -0.1002  | 47 | H | -9.35107 | -1.21758 | 0.265483 |
| 22  | C      | -6.08132 | -0.27338 | 0.06226  | 48 | H | -8.29689 | -3.45612 | 0.540076 |
| 23  | C      | -5.52253 | -1.55641 | 0.222392 | 49 | H | 4.221523 | 1.461676 | 0.89696  |
| 24  | O      | -4.18247 | -1.77786 | 0.223384 | 50 | H | 4.974631 | -2.35524 | -0.92527 |
| 25  | C      | -5.53571 | 2.188286 | -0.29125 | 51 | H | -3.05947 | 1.312369 | -0.23224 |

**Table S11:** Calculated atomic coordinates for probe **DH** in water.

| Row | Symbol | X        | Y        | Z        | Row | Symbol | X        | Y        | Z        |
|-----|--------|----------|----------|----------|-----|--------|----------|----------|----------|
| 1   | C      | -3.34936 | -0.79884 | 0.000759 | 27  | C      | -8.31749 | -1.24604 | -0.00268 |
| 2   | C      | -2.00696 | -1.26715 | 0.001373 | 28  | C      | -7.76129 | -2.52872 | -0.00101 |
| 3   | C      | -0.90781 | -0.45661 | 0.000164 | 29  | C      | -5.14903 | 0.86085  | -0.0003  |
| 4   | C      | 0.437209 | -0.89342 | 0.000722 | 30  | C      | -4.46946 | 3.206441 | -0.00066 |
| 5   | C      | 0.968804 | -2.18188 | 0.002987 | 31  | N      | -3.6316  | 4.009791 | -0.0013  |
| 6   | C      | 2.357386 | -2.22053 | 0.002924 | 32  | C      | -6.78605 | 2.789854 | 0.001833 |
| 7   | C      | 2.958326 | -0.9557  | 0.000499 | 33  | N      | -7.81874 | 3.321987 | 0.003464 |
| 8   | S      | 1.735248 | 0.273611 | -0.00159 | 34  | H      | -1.89621 | -2.34698 | 0.002737 |
| 9   | C      | 4.339768 | -0.5846  | -0.00053 | 35  | H      | -1.0578  | 0.620817 | -0.00146 |
| 10  | C      | 5.312219 | -1.53695 | -0.00056 | 36  | H      | 0.350121 | -3.07162 | 0.004814 |
| 11  | N      | 6.645307 | -1.28368 | -0.0012  | 37  | H      | 2.921426 | -3.14467 | 0.004814 |
| 12  | C      | 7.117307 | 0.035228 | -0.00055 | 38  | H      | 5.062449 | -2.59033 | -0.00012 |
| 13  | C      | 6.200942 | 1.100806 | -0.00068 | 39  | H      | 9.210052 | -0.50903 | 0.000506 |
| 14  | C      | 4.710819 | 0.873061 | -0.00234 | 40  | H      | 10.02407 | 1.798481 | 0.002082 |
| 15  | C      | 8.492488 | 0.302026 | 0.000423 | 41  | H      | 8.409752 | 3.69854  | 0.002181 |
| 16  | C      | 8.954706 | 1.612487 | 0.001347 | 42  | H      | 5.976851 | 3.223517 | 0.000394 |
| 17  | C      | 8.055008 | 2.673093 | 0.001402 | 43  | H      | 7.018528 | -3.3258  | -0.00212 |
| 18  | C      | 6.689902 | 2.403113 | 0.000417 | 44  | H      | 8.214388 | -2.36992 | -0.89199 |
| 19  | C      | 7.580658 | -2.39419 | -0.00139 | 45  | H      | 8.213726 | -2.37089 | 0.889727 |
| 20  | C      | -7.49965 | -0.13133 | -0.00253 | 46  | H      | -7.95886 | 0.846273 | -0.004   |
| 21  | C      | -3.78832 | 0.507218 | -0.00013 | 47  | H      | -5.92121 | -3.6628  | 0.001565 |
| 22  | C      | -6.09759 | -0.24777 | -0.00071 | 48  | H      | -9.39466 | -1.11976 | -0.00415 |
| 23  | C      | -5.57395 | -1.55458 | 0.000467 | 49  | H      | -8.40231 | -3.40398 | -0.00104 |
| 24  | O      | -4.24037 | -1.8116  | 0.001492 | 50  | H      | 4.266086 | 1.374831 | 0.870259 |
| 25  | C      | -5.49259 | 2.230051 | -8E-06   | 51  | H      | 4.268399 | 1.371969 | -0.8778  |
| 26  | C      | -6.3878  | -2.68404 | 0.000493 | 52  | H      | -3.03971 | 1.28837  | -0.00012 |



**Table S12:** Calculated atomic coordinates for probe E in water.

| Row | Symbol | X        | Y        | Z        | Row | Symbol | X        | Y        | Z        |
|-----|--------|----------|----------|----------|-----|--------|----------|----------|----------|
| 1   | C      | -3.67558 | -0.73132 | -0.09075 | 27  | C      | -6.53469 | 2.605304 | 0.344514 |
| 2   | C      | -2.31621 | -1.13237 | -0.13714 | 28  | N      | -6.41679 | 3.746136 | 0.503587 |
| 3   | C      | -1.24273 | -0.3017  | -0.02132 | 29  | C      | -8.07163 | 0.761796 | 0.070659 |
| 4   | C      | 0.116851 | -0.72702 | -0.0808  | 30  | N      | -9.16747 | 0.393743 | 0.006248 |
| 5   | C      | 0.650843 | -1.99071 | -0.28273 | 31  | C      | -3.62563 | 1.737085 | 0.255048 |
| 6   | C      | 2.04974  | -2.00367 | -0.27809 | 32  | N      | -3.06022 | 2.735629 | 0.400313 |
| 7   | C      | 2.604096 | -0.75232 | -0.07419 | 33  | H      | -2.14341 | -2.19431 | -0.27971 |
| 8   | S      | 1.382958 | 0.443713 | 0.121992 | 34  | H      | -1.40667 | 0.761165 | 0.126448 |
| 9   | C      | 4.017715 | -0.4066  | -0.02089 | 35  | H      | 0.047009 | -2.87498 | -0.44271 |
| 10  | C      | 4.939445 | -1.37084 | 0.413366 | 36  | H      | 2.63878  | -2.89582 | -0.45108 |
| 11  | N      | 6.243774 | -1.13991 | 0.474802 | 37  | H      | 4.61805  | -2.35216 | 0.735261 |
| 12  | C      | 6.780997 | 0.083059 | 0.125943 | 38  | H      | 3.848554 | 1.615105 | -0.72838 |
| 13  | C      | 5.890404 | 1.103944 | -0.3058  | 39  | H      | 8.854261 | -0.43372 | 0.516246 |
| 14  | C      | 4.51526  | 0.834446 | -0.37553 | 40  | H      | 9.703497 | 1.763447 | -0.11707 |
| 15  | C      | 8.16176  | 0.33117  | 0.191216 | 41  | H      | 8.17313  | 3.562502 | -0.87507 |
| 16  | C      | 8.637005 | 1.572521 | -0.16754 | 42  | H      | 5.733978 | 3.140348 | -0.99718 |
| 17  | C      | 7.767991 | 2.595503 | -0.59857 | 43  | H      | 6.519761 | -3.09008 | 1.164664 |
| 18  | C      | 6.418368 | 2.366088 | -0.66755 | 44  | H      | 7.836057 | -2.46711 | 0.148107 |
| 19  | C      | 7.12713  | -2.21896 | 0.937009 | 45  | H      | 7.654071 | -1.89672 | 1.834111 |
| 20  | C      | -4.27555 | 0.498277 | 0.075162 | 46  | H      | -3.85805 | -3.02588 | -1.73271 |
| 21  | C      | -5.70029 | 0.311623 | 0.035424 | 47  | H      | -5.62871 | -3.06962 | -1.71328 |
| 22  | O      | -5.99155 | -0.96303 | -0.14461 | 48  | H      | -4.77993 | -1.66661 | -2.4083  |
| 23  | C      | -4.76923 | -1.75829 | -0.24351 | 49  | H      | -3.88345 | -3.38765 | 0.858361 |
| 24  | C      | -4.7576  | -2.41847 | -1.61705 | 50  | H      | -4.81792 | -2.26074 | 1.863841 |
| 25  | C      | -4.7812  | -2.76807 | 0.897841 | 51  | H      | -5.65335 | -3.41724 | 0.797784 |
| 26  | C      | -6.73489 | 1.220475 | 0.150428 |     |        |          |          |          |

**Table S13:** Calculated atomic coordinates for probe EH in water.

| Row | Symbol | X        | Y        | Z        | Row | Symbol | X        | Y        | Z        |
|-----|--------|----------|----------|----------|-----|--------|----------|----------|----------|
| 1   | C      | -3.68266 | -0.75792 | 0.000017 | 42  | H      | 7.81427  | -2.3232  | -0.89188 |
| 2   | C      | -2.35573 | -1.1748  | -2.5E-05 | 43  | H      | 7.813455 | -2.32389 | 0.890995 |
| 3   | C      | -1.24615 | -0.33935 | -0.0005  | 44  | H      | -3.93561 | -3.25135 | -1.30573 |
| 4   | C      | 0.080791 | -0.76547 | -0.00035 | 45  | H      | -5.70784 | -3.2597  | -1.26787 |
| 5   | C      | 0.616746 | -2.06616 | 0.000512 | 46  | H      | -4.84004 | -1.98186 | -2.15439 |
| 6   | C      | 1.992506 | -2.10731 | 0.000463 | 47  | H      | -3.93522 | -3.25015 | 1.307829 |
| 7   | C      | 2.600763 | -0.83241 | -0.00044 | 48  | H      | -4.83976 | -1.98012 | 2.155535 |
| 8   | S      | 1.386819 | 0.402366 | -0.00124 | 49  | H      | -5.70746 | -3.25883 | 1.270164 |
| 9   | C      | 3.972718 | -0.47729 | -0.00079 | 50  | H      | 3.932396 | 1.480457 | 0.871119 |
| 10  | C      | 4.936419 | -1.451   | -0.00065 | 51  | H      | 3.93473  | 1.478279 | -0.8775  |
| 11  | N      | 6.261506 | -1.21744 | -0.00078 | 52  | H      | 4.66888  | -2.4997  | -0.00042 |
| 12  | C      | 6.758865 | 0.098379 | -5.9E-05 |     |        |          |          |          |
| 13  | C      | 5.860731 | 1.176925 | -0.0002  |     |        |          |          |          |
| 14  | C      | 4.368424 | 0.972794 | -0.00196 |     |        |          |          |          |
| 15  | C      | 8.137792 | 0.336782 | 0.000992 |     |        |          |          |          |
| 16  | C      | 8.623067 | 1.63854  | 0.002038 |     |        |          |          |          |
| 17  | C      | 7.741288 | 2.714071 | 0.002115 |     |        |          |          |          |
| 18  | C      | 6.371674 | 2.470711 | 0.001008 |     |        |          |          |          |
| 19  | C      | 7.182551 | -2.3431  | -0.00074 |     |        |          |          |          |
| 20  | C      | -4.28333 | 0.509176 | -0.00016 |     |        |          |          |          |
| 21  | C      | -5.69308 | 0.335997 | 0.000056 |     |        |          |          |          |
| 22  | O      | -6.01237 | -0.95039 | 0.000289 |     |        |          |          |          |
| 23  | C      | -4.80354 | -1.77322 | 0.00049  |     |        |          |          |          |
| 24  | C      | -4.824   | -2.61787 | -1.26687 |     |        |          |          |          |
| 25  | C      | -4.82373 | -2.61686 | 1.268536 |     |        |          |          |          |
| 26  | C      | -6.73559 | 1.258874 | 0.000125 |     |        |          |          |          |
| 27  | C      | -6.53601 | 2.654422 | -0.00046 |     |        |          |          |          |
| 28  | N      | -6.4179  | 3.807829 | -0.00093 |     |        |          |          |          |
| 29  | C      | -8.07028 | 0.796986 | 0.000689 |     |        |          |          |          |
| 30  | N      | -9.16933 | 0.4275   | 0.001182 |     |        |          |          |          |
| 31  | C      | -3.622   | 1.749726 | -0.00051 |     |        |          |          |          |
| 32  | N      | -3.04272 | 2.753662 | -0.00066 |     |        |          |          |          |
| 33  | H      | -2.19185 | -2.24804 | 0.000271 |     |        |          |          |          |
| 34  | H      | -1.40975 | 0.73433  | -0.00109 |     |        |          |          |          |
| 35  | H      | -0.00403 | -2.95398 | 0.001103 |     |        |          |          |          |
| 36  | H      | 2.556021 | -3.0313  | 0.001104 |     |        |          |          |          |
| 37  | H      | 8.840546 | -0.48684 | 0.001034 |     |        |          |          |          |
| 38  | H      | 9.695219 | 1.80614  | 0.002839 |     |        |          |          |          |
| 39  | H      | 8.114518 | 3.732868 | 0.003016 |     |        |          |          |          |
| 40  | H      | 5.67392  | 3.303806 | 0.000994 |     |        |          |          |          |
| 41  | H      | 6.607189 | -3.26619 | -0.00138 |     |        |          |          |          |

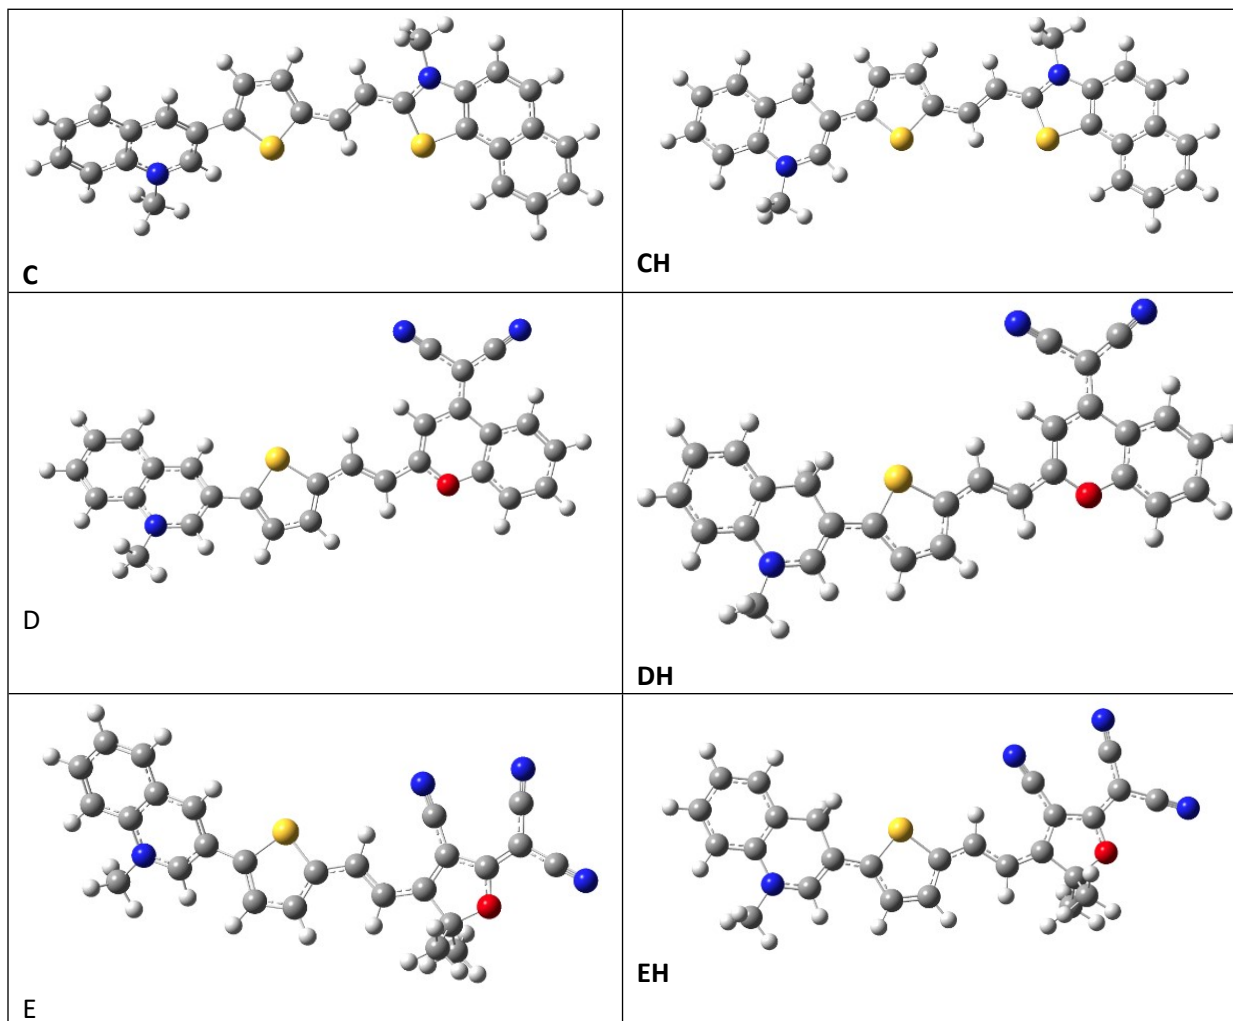

**Figure S28.** Drawings of the molecules **C**, **D**, **E**, **CH**, **DH**, and **EH** listed in Table 1 using GausView.<sup>22</sup>

#### 4. References

1. Dwivedi, S. K.; Arachchige, D. L.; Olowolagba, A.; Mahmoud, M.; Cunnien, J.; Tucker, D.; Fritz, D. R.; Werner, T.; Luck, R. L.; Liu, H., Thiophene-Based Organic Dye with Large Stokes Shift and Deep Red Emission for Live Cell NAD (P) H Detection under Varying Chemical Stimuli. *J. Mater. Chem. B* **2023**, *11* (27), 6296-6307.
2. Duan, D.-C.; Liu, J.; Zheng, Y.-L.; Chen, H.; Zhang, X.; Zhang, Y.; Dai, F.; Zhang, S.; Zhou, B., Cellular and Intravital Imaging of NAD (P) H by a Red-Emitting Quinolinium-Based Fluorescent Probe that Features a Shift of Its Product from Mitochondria to the Nucleus. *Analytical Chemistry* **2023**, *95* (2), 1335–1342.
3. Arachchige, D. L.; Dwivedi, S. K.; Jaeger, S.; Olowolagba, A.; Mahmoud, M.; Tucker, D. R.; Fritz, D. R.; Werner, T.; Luck, R. L.; Liu, H., Highly Sensitive Cyanine Dyes for Rapid Sensing of NAD(P)H in Mitochondria and First-Instar Larvae of *Drosophila melanogaster*. *ACS Appl. Bio Mater.* **2023**, *6*, 8, 3199–3212.
4. Podder, A.; Murali, V. P.; Deepika, S.; Dhamija, A.; Biswas, S.; Maiti, K. K.; Bhuniya, S., NADH-activated dual-channel fluorescent probes for multicolor labeling of live cells and tumor mimic spheroids. *Analytical Chemistry* **2020**, *92* (18), 12356-12362.
5. Li, M.; Liu, C.; Zhang, W.; Xu, L.; Yang, M.; Chen, Z.; Wang, X.; Pu, L.; Liu, W.; Zeng, X., An NADH-selective and sensitive fluorescence probe to evaluate living cell hypoxic stress. *Journal of Materials Chemistry B* **2021**, *9* (46), 9547-9552.
6. Komatsu, H.; Shindo, Y.; Oka, K.; Hill, J. P.; Ariga, K., Ubiquinone-Rhodol (UQ-Rh) for Fluorescence Imaging of NAD (P) H through Intracellular Activation. *Angewandte Chemie International Edition* **2014**, *53* (15), 3993-3995.
7. Wang, L.; Zhang, J.; Kim, B.; Peng, J.; Berry, S. N.; Ni, Y.; Su, D.; Lee, J.; Yuan, L.; Chang, Y.-T., Boronic acid: a bio-inspired strategy to increase the sensitivity and selectivity of fluorescent NADH probe. *Journal of the American Chemical Society* **2016**, *138* (33), 10394-10397.
8. Santra, M.; Sarkar, S.; Jun, Y. W.; Reo, Y. J.; Ahn, K. H., Dual probing of redox species, NAD (P) H and HOCl, with a benzo [a] phenoxazine based far red-emitting dye. *Tetrahedron Letters* **2018**, *59* (33), 3210-3213.
9. Zhao, Y.; Wei, K.; Kong, F.; Gao, X.; Xu, K.; Tang, B., Dicyanoisophorone-based near-infrared-emission fluorescent probe for detecting NAD (P) H in living cells and in vivo. *Analytical chemistry* **2018**, *91* (2), 1368-1374.
10. Pan, X.; Zhao, Y.; Cheng, T.; Zheng, A.; Ge, A.; Zang, L.; Xu, K.; Tang, B., Monitoring NAD (P) H by an ultrasensitive fluorescent probe to reveal reductive stress induced by natural antioxidants in HepG2 cells under hypoxia. *Chemical Science* **2019**, *10* (35), 8179-8186.
11. SeungáKim, J., A rhodamine based fluorescent probe validates substrate and cellular hypoxia specific NADH expression. *Chemical Communications* **2019**, *55* (4), 537-540.
12. Joo, J. H.; Youn, D.; Park, S. Y.; Shin, D.-S.; Lee, M. H., Mitochondria-targetable red-emitting probe for real-time fluorescence monitoring of NAD (P) H in live cells. *Dyes and Pigments* **2019**, *170*, 107561.
13. Maiti, M.; Murali, V. P.; Selvakumar, D.; Podder, A.; Maiti, K. K.; Bhuniya, S., NADH-induced “kick-on” fluorescent probe validates crosstalk with redox regulator GSH. *Sensors and Actuators B: Chemical* **2019**, *299*, 126964.

14. Joo, J. H.; Won, M.; Park, S. Y.; Park, K.; Shin, D.-S.; Kim, J. S.; Lee, M. H., A dicyanocoumarin-fused quinolinium based probe for NAD (P) H and its use for detecting glycolysis and hypoxia in living cells and tumor spheroids. *Sensors and Actuators B: Chemical* **2020**, *320*, 128360.
15. Podder, A.; Thirumalaivasan, N.; Chao, Y. K.; Kukutla, P.; Wu, S.-P.; Bhuniya, S., Two-photon active fluorescent indicator for detecting NADH dynamics in live cells and tumor tissue. *Sensors and Actuators B: Chemical* **2020**, *324*, 128637.
16. Wei, H.; Yu, Y.; Wu, G.; Wang, Y.; Duan, S.; Han, J.; Cheng, W.; Li, C.; Tian, X.; Zhang, X., Dual-responsive fluorescent probe for imaging NAD (P) H and mitochondrial viscosity and its application in cancer cell ferroptosis. *Sensors and Actuators B: Chemical* **2022**, *350*, 130862.
17. Fomin, M. A.; Dmitriev, R. I.; Jenkins, J.; Papkovsky, D. B.; Heindl, D.; König, B., Two-acceptor cyanine-based fluorescent indicator for NAD (P) H in tumor cell models. *Acs Sensors* **2016**, *1* (6), 702-709.
18. Zhang, Y.; Arachchige, D. L.; Olowolagba, A.; Luck, R. L.; Liu, H., Near-infrared fluorescent probe based on rhodamine derivative for detection of NADH in live cells. *Methods* **2022**, *204*, 22-28.
19. Chang, H.; Hu, X.; Tang, X.; Tian, S.; Li, Y.; Lv, X.; Shang, L., A Mitochondria-Targeted Fluorescent Probe for Monitoring NADPH Overproduction during Influenza Virus Infection. *ACS sensors* **2023**, *8* (2), 829-838.
20. Ma, K.; Yang, H.; Wu, X.; Huo, F.; Cheng, F.; Yin, C. An Activatable NIR Fluorescent Probe for NAD(P)H and Its Application to the Real-Time Monitoring of p53 Abnormalities In Vivo. *Angew. Chem. Int. Ed.* **2023**, *62*, e2023015.
21. Frisch, M. J. ; Trucks, G. W.; Schlegel, H. B.; Scuseria, G. E.; Robb, M. A.; Cheeseman, J. R.; Scalmani, G.; Barone, V.; Petersson, G. A.; Nakatsuji, H.; Li, X.; Caricato, M.; Marenich, A. V.; Bloino, J.; Janesko, B. G.; Gomperts, R.; Mennucci, B.; Hratchian, H. P.; Ortiz, J. V.; Izmaylov, A. F.; Sonnenberg, J. L.; Williams-Young, D.; Ding, F.; Lipparini, F.; Egidi, F.; Goings, J.; Peng, B.; Petrone, A.; Henderson, T.; Ranasinghe, D.; Zakrzewski, V. G.; Gao, J.; Rega, N.; Zheng, G.; Liang, W.; Hada, M.; Ehara, M.; Toyota, K.; Fukuda, R.; Hasegawa, J.; Ishida, M.; Nakajima, T.; Honda, Y.; Kitao, O.; Nakai, H.; Vreven, T.; Throssell, K.; Montgomery, Jr, J. A.; Peralta, J. E.; Ogliaro, F.; Bearpark, M. J.; Heyd, J. J.; Brothers, E. N.; Kudin, K. N.; Staroverov, V. N.; Keith, T. A.; Kobayashi, R.; Normand, J.; Raghavachari, K.; Rendell, A. P.; Burant, J. C.; Iyengar, S. S.; Tomasi, J.; Cossi, M.; Millam, J. M.; Klene, M.; Adamo, C.; Cammi, R.; Ochterski, J. W.; Martin, R. L.; Morokuma, K.; Farkas, O.; Foresman J. B.; Fox, D. J., *Journal*, 2016.
22. Dennington, R.; Keith T. A.; Millam, J. M., *Journal*, GaussView, Version 6.0.16. Semichem Inc. 2016.
